# A persistent behavioral state enables sustained predation of humans by mosquitoes

Trevor R. Sorrells<sup>1,2\*</sup>, Anjali Pandey<sup>1</sup>, Adriana Rosas-Villegas<sup>1</sup>, and Leslie B. Vosshall<sup>1-3\*</sup>

<sup>1</sup>Laboratory of Neurogenetics and Behavior, The Rockefeller University, New York, NY 10065 USA, <sup>2</sup>Kavli Neural Systems Institute, New York, NY 10065 USA, <sup>3</sup>Howard Hughes Medical Institute, New York, NY 10065 USA. Current Address: Department of Biology, Brandeis University, 415 South Street, Waltham, MA 02453 United States (A.P.). For correspondence: [trevorsorrells@gmail.com](mailto:trevorsorrells@gmail.com), [leslie.vosshall@rockefeller.edu](mailto:leslie.vosshall@rockefeller.edu)

**Abstract** Predatory animals pursue prey in a noisy sensory landscape, deciding when to continue or abandon their chase. The mosquito *Aedes aegypti* is a micropredator that first detects humans at a distance through sensory cues such as carbon dioxide. As a mosquito nears its target it senses more proximal cues such as body heat that guides it to a meal of blood. How long the search for blood continues after initial detection of a human is not known. Here we show that a 5-second optogenetic pulse of fictive carbon dioxide induced a persistent behavioral state in female mosquitoes that lasted for more than 10 minutes. This state is highly specific to females searching for a blood meal and was not induced in recently blood-fed females or in males, who do not feed on blood. In males that lack the gene *fruitless*, which controls persistent social behaviors in other insects, fictive carbon dioxide induced a long-lasting behavior response resembling the predatory state of females. Finally, we show that the persistent state triggered by detection of fictive carbon dioxide enabled females to engorge on a blood meal mimic offered up to 14 minutes after the initial 5-second stimulus. Our results demonstrate that a persistent internal state allows female mosquitoes to integrate multiple human sensory cues over long timescales, an ability that is key to their success as an apex micropredator of humans.

## Introduction

Predatory animals first detect, then pursue, and ultimately capture prey (**Endler, 1991**). Because the pursuit phase can last for extended periods of time, it is critical for predators to persist in the chase even when the prey is not constantly detected. It is equally important for predators to abandon pursuit if enough time has elapsed that prey capture is unlikely to occur. This decision balances the need to obtain food with the expenditure of energy on unsuccessful hunts (**Anholt et al., 1987, Williams et al., 2014**). The duration of a pursuit could depend on the predator repeatedly sensing prey stimuli. Alternatively, it may be sustained by recent prior experience or a change in the internal state of the predator that outlasts individual prey stimuli.

Micropredators such as the mosquito consume small quantities of their live prey rather than killing them outright (**Lafferty et al., 2002**), but employ similar tactics to other pursuit predators. Female mosquitoes combine rich multisensory information from olfactory, visual,

44 taste, mechanosensory, and contact chemosensory systems to hunt humans from whom they  
45 obtain blood to produce eggs. Carbon dioxide (CO<sub>2</sub>) produced by human breath is highly  
46 volatile, traveling long distances from the human host. Detection of CO<sub>2</sub> by the mosquito  
47 results in an increase in flying behavior (**Eiras et al., 1991, McMeniman et al., 2014**) and  
48 upwind flight (**Dekker et al., 2011, Dekker et al., 2005, Geier et al., 1999**) that is often  
49 referred to as “activation”. However, mosquitoes require an additional, more proximal host cue  
50 such as body heat or skin odor for short-range attraction and to engorge on blood (**Corfas et**  
51 **al., 2015, Dekker et al., 2011, Dekker et al., 2005, Geier et al., 1999, McMeniman et al.,**  
52 **2014, van Breugel et al., 2015**) (**Figure 1A**). In natural settings, human sensory cues are  
53 typically brief and intermittent by the time they reach the mosquito due to turbulent air flows  
54 and long distances (**Koehl, 2006**). However, studies of insect navigation have documented  
55 only short-term responses to these stimuli on the order of a few seconds (**Álvarez-Salvado et**  
56 **al., 2018, Dekker et al., 2011, Demir et al., 2020, Pang et al., 2018**). If mosquitoes possess  
57 the ability to retain information about their prey and combine it with future information this may  
58 explain their success at locating and feeding on human blood. Although the short-term role of  
59 CO<sub>2</sub> in mosquito behavior has been known for nearly 100 years (**Rudolfs, 1922**), the idea that  
60 CO<sub>2</sub> induces a long-term change in the internal state of the mosquito has not previously been  
61 tested experimentally.

62  
63 To study pursuit predation in the mosquito, we developed optogenetic tools to precisely deliver  
64 short pulses of fictive CO<sub>2</sub>. This allowed us to test the effect of activating CO<sub>2</sub> sensory neurons  
65 with greater temporal resolution and without the continuous stimulus of air flow required for  
66 delivery of real CO<sub>2</sub>. We observed that detection of fictive prey led to a long-lasting behavioral  
67 change in female mosquitoes. Following a 5-second fictive CO<sub>2</sub> stimulus, animals exhibited  
68 high-arousal behaviors and engorged on a blood meal mimic offered up to 14 minutes later.  
69 Neither males nor previously blood-fed females showed these effects, and this persistent  
70 internal state was not induced by optogenetic stimulation of a sweet taste pathway.  
71 Remarkably, males lacking the *fruitless* gene showed long-lasting responses to fictive CO<sub>2</sub>  
72 resembling those in females, consistent with our prior observation that these mutants show  
73 some aspects of female mosquito behavior (**Basrur et al., 2020**). Our work identifies a  
74 persistent internal state that may explain how mosquitoes aggressively pursue human hosts  
75 for many minutes.

76

## 77 Results

### 78 Fictive CO<sub>2</sub> triggers blood feeding

79 We created optogenetic tools in *Aedes aegypti* mosquitoes that allowed us to precisely  
80 activate sensory neurons that are specialized to detect CO<sub>2</sub>. To do this we generated a  
81 transgenic strain that expresses the red light-activated cation channel CsChrimson  
82 translationally fused to the tdTomato fluorescent reporter (**Klapoetke et al., 2014**) under  
83 control of the *QF2/QUAS* bipartite transcription system (**Potter et al., 2010**). We crossed this  
84 transgene into a strain that expresses the QF2 transcription factor in neurons that express the  
85 Gr3 CO<sub>2</sub> receptor subunit (**McMeniman et al., 2014, Younger et al., 2020**) (**Figure 1B**).  
86 CsChrimson-tdTomato was detected in maxillary palp neurons but not antennal neurons,  
87 consistent with the observation that maxillary palp neurons are exquisitely sensitive to CO<sub>2</sub>  
88 (**Grant et al., 1995**) (**Figure 1C,D**). As expected, we found that CsChrimson-expressing  
89 neurons extended axons that innervated glomerulus MD1 in the antennal lobe of the mosquito

90 brain (Figure 1E), which is known to be CO<sub>2</sub>-sensitive (Younger et al., 2020). To test whether  
91 mosquitoes responded to optogenetic activation of CO<sub>2</sub> sensory neurons, we presented  
92 animals with a 5-second red light (627 nm) stimulus and tracked their movement (Figure 1F-I).  
93 Control animals carrying only the *Gr3-QF2* driver or the *QUAS-CsChrimson* transgene reporter  
94 showed no response to red light. However, mosquitoes with both genetic elements (*Gr3 >*  
95 *CsChrimson*) increased their velocity in response to the stimulus (Figure 1H-I). This is  
96 consistent with the known role of CO<sub>2</sub> in activating mosquitoes.

97  
98 When combined with another host cue such as heat, CO<sub>2</sub> is sufficient to elicit blood feeding in  
99 female mosquitoes (McMeniman et al., 2014). To test whether fictive CO<sub>2</sub> sensation triggered  
100 by optogenetic activation of *Gr3* sensory neurons could replace real CO<sub>2</sub>, we created a  
101 behavior assay called the opto-membrane feeder (Figure 1J). This assay consists of a  
102 cylindrical canister of mosquitoes surrounded by red light-emitting diodes (LEDs) and a warm  
103 blood meal behind a membrane sitting on top of the mesh lid. Mosquitoes were presented with  
104 either CO<sub>2</sub>, fictive CO<sub>2</sub> via red light, or neither stimulus. Control mosquitoes with either *Gr3-*  
105 *QF2* or *QUAS-CsChrimson* were attracted to the warm blood meal and engorged only when  
106 presented with CO<sub>2</sub> but not when presented with red light (Figure 1K-M). In contrast, *Gr3 >*  
107 *CsChrimson* mosquitoes were attracted and engorged in the presence of either real or fictive  
108 CO<sub>2</sub>, the latter delivered as a red-light stimulus (Figure 1K-M). These results demonstrate that  
109 mosquitoes interpreted optogenetic activation of the CO<sub>2</sub> sensory neurons as a host cue that is  
110 sufficient to drive blood feeding.

## 112 Fictive CO<sub>2</sub> induces prolonged host-seeking behaviors

113 Host-seeking begins when female mosquitoes detect a human, typically by sensing volatile  
114 cues like CO<sub>2</sub>. Once activated by human odorants, they seek out the source of the cues, and  
115 upon landing, mosquitoes walk to locate a patch of skin to pierce. To understand the timing  
116 and nature of the mosquito response to transient host cues, we created an assay called the  
117 opto-thermocycler (Figure 2A-B). In this assay mosquitoes receive optogenetic light stimulation  
118 from above and heat through the mesh at the bottom of the assay chamber. The use of fictive  
119 CO<sub>2</sub> delivered optogenetically was critical for studying the internal state of the mosquito after  
120 these transient host cues. Delivery and removal of real CO<sub>2</sub> necessitates constant air flow,  
121 which is itself an important sensory cue for insects.

122  
123 We employed machine-learning based behavior classification as a high-throughput readout of  
124 mosquito behavioral responses (Figure 2C-D). We tracked nine points on the mosquito body  
125 using Animal Part Tracker and four behaviors using JAABA (Kabra et al., 2013): grooming,  
126 flying, walking, and probing, a behavior in which the mosquito inserts its proboscis through the  
127 mesh in the bottom of the container. When none of these four behaviors were present,  
128 mosquitoes were predominantly motionless, showed slow hindleg movement, or occasionally  
129 flailed against the wall of the assay chamber without walking. All classifiers showed high  
130 accuracy with >90% true positive and true negative rates on a set of test video frames  
131 (Supplementary File 1).

132  
133 We delivered 5-second red light pulses and heat increases to simulate brief CO<sub>2</sub> and human  
134 body heat stimuli (Figure 2B). Mosquitoes responded to individual heat and fictive CO<sub>2</sub> stimuli  
135 with elevated walking, flying, and probing (Figure 2E-H, Figure 2—figure supplement 1). The

136 response to heat alone was dominated by probing and returned to baseline after about one  
137 minute ( $t_{1/2 \text{ probing}} = 0.4$  minutes). In contrast, fictive CO<sub>2</sub> alone caused an immediate flight and  
138 probing response followed by sustained walking, flying, and probing (Figure 2H, Figure 2—  
139 figure supplement 1, Supplementary Video 1) that took approximately 15 minutes to return to  
140 baseline ( $t_{1/2 \text{ probing}} = 3.9$  minutes). The long duration of the response to CO<sub>2</sub> is reminiscent of  
141 persistent internal states in other organisms (Asahina et al., 2014, Flavell et al., 2013,  
142 Hindmarsh Sten et al., 2021, Marques et al., 2020).

143  
144 These observations of mosquito behavior could reflect an internal state specific to host-  
145 seeking behavior or a general arousal state elicited by many sensory stimuli. Like CO<sub>2</sub>, bright  
146 light is also an arousal signal in mosquitoes (Araripe et al., 2018) so we asked whether bright  
147 light induces a long-lasting behavior state. Mosquitoes have weaker visual sensitivity to red  
148 wavelengths (San Alberto et al., 2021), and we saw no behavioral response to red light  
149 (Figure 2E), so we used green light. Because this experiment is designed to test whether  
150 mosquitoes have a response to a visual stimulus, a question that does not depend on the use  
151 of optogenetics, we used wild-type mosquitoes. A bright green light stimulus induced a brief  
152 response dominated by walking ( $t_{1/2 \text{ walking}} = 0.4$  minutes), much shorter than the response to  
153 fictive CO<sub>2</sub> (Figure 2I,K).

154  
155 While CO<sub>2</sub> and heat elicit the blood-feeding program required for females to produce eggs,  
156 mosquitoes possess a second, distinct feeding program for ingestion of flower nectar for  
157 energy (Jové et al., 2020, Lahondere et al., 2020). We asked whether optogenetic stimulation  
158 of *Gr4* sensory neurons that are thought to detect sugar evoked a sustained behavior  
159 response in mosquitoes as with optogenetic activation of the CO<sub>2</sub> sensory neurons. We found  
160 that fictive sugar elicited a response composed largely of probing that was of shorter duration  
161 than fictive CO<sub>2</sub> ( $t_{1/2 \text{ probing}} = 1.5$  minutes) (Figure 2J,L).

162  
163 The temporal resolution of our assays allowed us to understand precisely how mosquitoes  
164 integrate CO<sub>2</sub> and heat to affect their behavior. We focused on the first 15 seconds after  
165 stimulus onset during which the greatest behavior responses are seen. We found that the  
166 heightened probing response seen when the stimuli were presented together was roughly  
167 additive with respect to the individual stimuli (Figure 2M, Figure 2—figure supplement 2). In  
168 contrast, flying was strongly suppressed. This demonstrates that multimodal integration of host  
169 cues biases action selection away from long-range flight and toward a short-range probing  
170 behavior.

171  
172 Heat is a host cue but also may be experienced by the mosquito under other environmental  
173 contexts. We compared the integration of heat with green light and fictive sugar to see if they  
174 are integrated similarly to the host cue CO<sub>2</sub>. In contrast to the integration of host cues, probing  
175 was suppressed when non-host cues were presented together (Figure 2M, Figure 2—figure  
176 supplement 2). This demonstrates that the mosquito nervous system uses different  
177 computations for the integration of host cues and non-host cues.

## 178 179 **The CO<sub>2</sub>-evoked persistent state is specific to host seeking**

180 The fact that bright green light and fictive sugar stimuli elicited briefer responses suggested  
181 that the prolonged response to fictive CO<sub>2</sub> is specific to host seeking. If true, it should be

182 modulated similarly to host-seeking behavior. Host seeking in *Aedes aegypti* is suppressed  
183 after a female takes a blood meal, only returning after she lays eggs several days later (**Duvall**  
184 **et al., 2017, Klowden, 1981**). We allowed female mosquitoes to blood feed on a human arm  
185 and then assayed their behavior four days later (**Figure 3A,B,D,E**). We found that blood-fed  
186 females completely lost their response to fictive CO<sub>2</sub> and nearly completely lost their response  
187 to heat. This demonstrates that in addition to losing the persistent state, blood-fed females lose  
188 even brief responses to host cues.

189  
190 Unlike females, male mosquitoes do not seek out hosts to feed on blood. Males do  
191 demonstrate a flight response to CO<sub>2</sub> (**Matthews et al., 2016**) and are reported to congregate  
192 in the vicinity of humans where they mate with female mosquitoes (**Hartberg, 1971**). We  
193 observed that male mosquitoes had minimal responses to heat, but substantial flight and  
194 walking responses to fictive CO<sub>2</sub> (**Figure 3C-E**). However, the response to fictive CO<sub>2</sub> was  
195 brief, decaying rapidly back to baseline ( $t_{1/2 \text{ probing}} = 0.4$  minutes). This observation suggests  
196 that the persistence—but not the initial response—is specifically regulated in a sexually  
197 dimorphic manner.

198  
199 We have previously shown that *fruitless* mutant male mosquitoes gain strong attraction to  
200 human odor (**Basrur et al., 2020**). We asked whether these *fruitless* mutant males have an  
201 altered response to fictive CO<sub>2</sub> stimuli. First, we confirmed that *fruitless* mutant males lacking  
202 *Gr3 > CsChrimson* did not respond to red light, as expected (**Figure 3F**). *fruitless*  
203 heterozygotes receiving fictive CO<sub>2</sub> showed a brief response ( $t_{1/2 \text{ probing}} = 0.4$  minutes) (**Figure**  
204 **3G,I,J**), similar to the response we saw for wild type males (**Figure 3C**). By comparison,  
205 *fruitless* mutant males receiving fictive CO<sub>2</sub> showed a strong and sustained response for  
206 minutes after the stimulus ( $t_{1/2 \text{ probing}} = 1.7$  minutes) (**Figure 3H-J**). Thus, *fruitless* regulates the  
207 persistent host-seeking state by suppressing this behavior in males. We note that the duration  
208 of the sustained response of *fruitless* mutant males is shorter than in females, suggesting  
209 additional sexually dimorphic factors may regulate this internal state. Taken together, these  
210 results demonstrate that blood-fed females and males, which do not engage in blood-feeding  
211 behavior, lack sustained responses to brief pulses of fictive CO<sub>2</sub>. Males lacking the gene  
212 *fruitless* were previously reported to show strong attraction to human scent (**Basrur et al.,**  
213 **2020**) and we show here that they also demonstrate strong and long-lasting responses to  
214 fictive CO<sub>2</sub> reminiscent of females. This raises the possibility that the persistent state is the  
215 behavioral mechanism by which the goal of blood feeding is sustained in the female mosquito.

## 216 217 **Mosquitoes integrate sensory cues for minutes**

218 Motivation consists of two components: increased arousal and directed action toward a goal.  
219 We have demonstrated that fictive CO<sub>2</sub> induces a prolonged increase in movement and the  
220 probing behavior that immediately precedes blood feeding. We asked whether the persistent  
221 state induced by a brief pulse of fictive CO<sub>2</sub> can influence the response to body heat and  
222 ultimately if it can induce blood feeding many minutes afterwards.

223  
224 First, we tested whether fictive CO<sub>2</sub> primes subsequent responses to heat (**Figure 4A**).  
225 Because CO<sub>2</sub> is highly volatile, mosquitoes likely sense this cue before body heat in  
226 naturalistic host-seeking settings. When we presented heat first followed by fictive CO<sub>2</sub>,  
227 relatively small behavioral responses were evoked (**Figure 4B-C**). However, when fictive CO<sub>2</sub>

228 was presented simultaneously with heat or 15 or 60 seconds prior to heat, larger walking and  
229 probing responses were seen (Figure 4B-C). This suggests that mosquitoes respond most  
230 strongly to the naturalistic temporal order of these host cues. Next, we asked how long prior to  
231 the heat stimulus fictive CO<sub>2</sub> can boost the response (Figure 4D). Compared to heat alone,  
232 walking and probing were increased when a fictive CO<sub>2</sub> stimulus was presented up to four  
233 minutes prior (Figure 4E-F). This demonstrates that in addition to the sustained behavior  
234 response, fictive CO<sub>2</sub> increases the response to heat for minutes afterward.

235  
236 Once a mosquito pierces the skin of a human host, taste cues present in the blood guide the  
237 decision to engorge. Because this is the final goal of host-seeking behavior, we wondered  
238 whether mosquitoes in the fictive CO<sub>2</sub>-triggered persistent state had altered responses to both  
239 heat and taste stimuli. To test this, we designed an opto-feeder assay that incorporated a thin  
240 sheet of a blood meal mimic located between the thermocycler heating element and the mesh  
241 below the mosquito, allowing it to be rapidly heated and cooled (Figure 4G-H). We used a  
242 solution of ATP in saline, which has previously been shown to be a highly palatable meal that  
243 induces females to engorge in the same manner as blood (Galun et al., 1963, Jové et al.,  
244 2020). This allowed us to test how the prolonged arousal state induced by fictive CO<sub>2</sub>  
245 influences the decision of the mosquito to feed on a blood meal mimic.

246  
247 First, we explored the temporal relationship of host stimuli to test whether the naturalistic order  
248 of CO<sub>2</sub>, heat, and taste stimuli elicits greater rates of feeding. When fictive CO<sub>2</sub> was presented  
249 along with heating of the meal for 10 minutes, many females fed to repletion (Figure 4I). To  
250 test the temporal order of these cues, we offered fictive CO<sub>2</sub> and a meal that was only warmed  
251 for several minutes, resulting in reduced feeding levels (Figure 4I). When the order was  
252 swapped and females were briefly offered the warm meal prior to fictive CO<sub>2</sub>, very few females  
253 fed (Figure 4I). This suggests that mosquitoes feed at the highest rates when they receive a  
254 CO<sub>2</sub> stimulus prior to heat and taste stimuli. Next, we asked how long after a brief pulse of  
255 fictive CO<sub>2</sub> females would retain the motivation to feed on the blood meal mimic. When offered  
256 the warm meal without fictive CO<sub>2</sub>, few females fed. We then stimulated the females with fictive  
257 CO<sub>2</sub> and heated the blood meal mimic either immediately or after a delay of 2, 8, 14, or 20  
258 minutes after fictive CO<sub>2</sub>. We hypothesized that if the fictive CO<sub>2</sub> induced a persistent state of  
259 host seeking, it might trigger engorging behavior many minutes later. Indeed, fictive CO<sub>2</sub> was  
260 able to potentiate feeding when presented up to 14 minutes prior to heating of the blood meal  
261 mimic (Figure 4J). Taken together, our results demonstrate that the persistent host-seeking  
262 state increases host-seeking behaviors and alters the response to sensory cues for many  
263 minutes after a brief fictive CO<sub>2</sub> stimulus. We speculate that this reflects the amount of time a  
264 mosquito will pursue a host in a naturalistic setting before halting the search if it appears that  
265 the host is no longer nearby.

266  
267 We noticed that there is considerable individual variation in how mosquitoes respond to the  
268 warm blood meal mimic after being activated by fictive CO<sub>2</sub> (Figure 4J). We asked whether the  
269 behavior state of individual mosquitoes could be inferred over longer periods of time. We  
270 extracted 38 behavior parameters from the experiment in Figure 4J from 30-second-long time  
271 windows and used t-distributed stochastic neighbor embedding (tSNE) to visualize the  
272 relationships. This embedding revealed that mosquito behavior fell into four major states that  
273 we termed rest, global search, local search, and engorge (Figure 4K, Figure 4—figure

274 **supplement 1**). These states were observed even when the length of the time window was  
275 varied over a 6-fold range (**Figure 4—figure supplement 2**). The states differed in the  
276 proportions of behaviors observed, the transition rates between them, and the total distance  
277 the mosquito travelled while in each state. We divided the data into those females that  
278 eventually fed or did not feed at the end of the experiment (**Figure 4L**). As expected, the  
279 engorge state was greatly enriched in mosquitoes that were categorized as fed, demonstrating  
280 that this method is effective at identifying longer-timescale behavior states (**Figure 4L**).

281  
282 We asked whether the behavior state of the mosquito after fictive CO<sub>2</sub> was associated with the  
283 future decision to feed on the warm blood meal mimic. We found that fed and unfed  
284 mosquitoes showed similar amounts of global search pre-heat but greater levels of local  
285 search for those that would later feed (**Figure 4M**). The local search state differs primarily by  
286 showing more probing and less flight than the global search state. To avoid potential  
287 distortions created by the 2-dimensional embedding (**Chari et al., 2021**), we trained a linear  
288 classifier using only the four behaviors (groom, walk, flight, and probe). A classifier trained on  
289 the proportion of time mosquitoes spent in each behavior for 2 minutes after the light stimulus  
290 could predict which mosquitoes would later feed with above-chance accuracy (**Figure 4N**).  
291 Thus, the behavior state that individual mosquitoes enter in response to fictive CO<sub>2</sub> reflects the  
292 likelihood of response to future sensory cues.

293

## 294 Discussion

295 We investigated how female mosquitoes pursue humans by combining multisensory stimuli in  
296 time to achieve the goal of feeding on human blood. To precisely control the delivery of CO<sub>2</sub>,  
297 we generated optogenetic tools to deliver fictive CO<sub>2</sub> and combined this with high-resolution  
298 behavior assays and machine learning analysis approaches. These experiments demonstrated  
299 that optogenetic activation of CO<sub>2</sub> sensory neurons induced a long-lasting behavior state  
300 change (**Figure 4O**). During this time mosquitoes had heightened responses to heat and were  
301 more likely to feed on a blood meal mimic even if encountered minutes after the CO<sub>2</sub> stimulus.

302

303 Integration of sensory information over time allows the nervous system to optimize decision  
304 making for a particular goal (**Körding, 2007**). Testing whether predators use this approach  
305 during hunting requires a precise understanding of what the predator is sensing and when,  
306 precluding field studies. Laboratory studies have found behavior responses altered for as long  
307 as a few seconds after encountering CO<sub>2</sub> in mosquitoes and other olfactory stimuli in  
308 *Drosophila* (**Álvarez-Salvado et al., 2018, Dekker et al., 2011, Demir et al., 2020, Pang et**  
309 **al., 2018**). Although this timescale of sensory integration is sufficient for upwind tracking,  
310 modelling suggests that integration over long timescales can maximize the information about  
311 the location of an olfactory stimulus (**Vergassola et al., 2007**). Here, we show that mosquitoes  
312 integrate olfactory, heat, and taste stimuli for at least 14 minutes, much longer than previously  
313 assumed. The increased movement and the bias of actions toward a particular goal constitute  
314 an internal motivational state sustained over minutes—one specific to feeding on humans.  
315 Importantly, our results show that this internal state does not require constant flight behavior or  
316 a constant air flow stimulus, demonstrating that it is maintained by an internal mechanism  
317 rather than continuous sensory or reafferent stimuli.

318

319 In principle, the long-duration characteristic of the host-seeking state could be generated by  
320 neurons at any point in the circuit. However, it is extensively documented in *Aedes aegypti* that  
321 CO<sub>2</sub> sensory neurons show an accurate readout of CO<sub>2</sub> levels over a large concentration  
322 range (**Grant et al., 2007, Grant et al., 1995**). These neurons do not show adaptation or  
323 prolonged activity (**Grant et al., 1995**) and have similar responses in males and females  
324 (**Grant et al., 2007**). While we suspect, based on precedents for persistent states observed in  
325 other systems, that the persistent state is controlled in the central brain, we cannot exclude a  
326 contribution from the periphery. In mice, circuits originating in the central amygdala promote  
327 pursuit and attack during cricket hunting (**Han et al., 2017**), but these behaviors appear time-  
328 locked to optogenetic activation and a circuit controlling hunting persistence has not been  
329 identified.

330  
331 Mosquito host seeking shares some characteristics with other social and feeding states  
332 (**Asahina et al., 2014, Flavell et al., 2013, Hindmarsh Sten et al., 2021, Marques et al.,**  
333 **2020**). The pursuit of females by males during courtship behavior in *Drosophila* shows  
334 especially striking similarities. In response to female sensory cues or stimulation of a subset of  
335 *fruitless* neurons, male flies enter a state of increased courtship behaviors and lower  
336 thresholds for sensory cues from females (**Clowney et al., 2015, Hindmarsh Sten et al.,**  
337 **2021, Inagaki et al., 2014, Jung et al., 2020**). It appears that this function of *fruitless* is  
338 conserved and displays the properties of persistence and sexual dimorphism (**Bertossa et al.,**  
339 **2009, Demir et al., 2005, Manoli et al., 2005**). These similarities suggest that mosquito  
340 evolution may have co-opted these properties of ancestral *fruitless* circuits to drive a novel  
341 feeding behavior.

342  
343 This study illuminates why mosquitoes are such effective predators: they maintain the goal of  
344 blood feeding for minutes even in the absence of any additional positive stimuli or  
345 reinforcement. Because this state greatly outlasts individual sensory stimuli and integrates  
346 multiple modalities, any intervention that disrupts this internal drive state should be more  
347 effective than vector control measures that mask or disrupt any individual aspect of host-  
348 seeking.

349

## 350 **Methods**

### 351 **Human and animal ethics statement**

352 Blood feeding of mosquitoes with live mice was conducted according to IACUC protocol  
353 17108. Blood feeding of mosquitoes with human subjects was conducted according to IRB  
354 protocol LV-0652. Human subjects gave written informed consent to participate in the  
355 experiments.

356

### 357 **Mosquito strains**

358 The following *Aedes aegypti* strains were used in this paper: wild type Liverpool, *Gr3-QF2*  
359 (**Younger et al., 2020**), *Gr4-QF2* (**Jové et al., 2020**), *fruitless*<sup>ΔM</sup> (**Basrur et al., 2020**),  
360 *fruitless*<sup>ΔM-tdTomato</sup> (**Basrur et al., 2020**), and *QUAS-CsChrimson* (this study).

361

### 362 **Mosquito rearing**

363 Mosquito strains were reared at 26°C ± 2°C with 80% humidity and 14 hours light, 10 hours  
364 dark (lights on at 7AM) as previously described (**DeGennaro et al., 2013**). Embryos were



365 hatched in hatching broth: 1 pellet of fish food (TetraMin Tropical Tablets, Pet Mountain  
366 16110M) crushed using a mortar and pestle, added to 850 mL deionized water, then  
367 autoclaved. Larvae were reared in deionized water and fed 1-3 tablets of fish food per day.  
368 Adult mosquitoes were fed on 10% sucrose (w/v in distilled water) ad libitum. Sucrose was  
369 delivered in a Boston clear round 60 mL glass bottle (Fisher FB02911944) filled with 50 mL  
370 10% sucrose. A cotton dental wick (Richmond Dental 201205) was inserted into the bottle and  
371 mosquitoes fed from the sugar-moistened wick. Female mosquitoes were blood fed on mice or  
372 human arm to generate eggs. Eggs were dried at 26°C and 80% humidity for 3 days, and then  
373 stored at ambient temperature and humidity for up to 3 months. Adults were allowed to mate  
374 freely for at least 7 days prior to performing experiments. All behavior experiments were  
375 carried out in the light phase of the photoperiod, with most experiments occurring between  
376 Zeitgeber (ZT) ZT2 to ZT12.

### 377 378 **Creation of CsChrimson mosquitoes for optogenetics**

379 We generated mosquitoes that expressed a translational fusion of CsChrimson to tdTomato  
380 under the control of the QUAS promoter, referred to as *CsChrimson* or *QUAS-CsChrimson*  
381 throughout the paper. The coding sequence of *CsChrimson-tdTomato* was PCR-amplified from  
382 the vector p20X (Klapoetke et al., 2014) using the following oligonucleotide primers: forward  
383 5'-CTCGAGCAAATGAGCAGACTGGTCGCCGCTTC-3', reverse 5'-  
384 ATCCTCTAGATTACACCTCGTTCTCGTAGCAGAATTTATACAG-3'. The vector backbone  
385 from pXL-BacII (Riabinina et al., 2016) was amplified by PCR using the following  
386 oligonucleotide primers: forward 5'-GTCTGCTCATTGCTCGAGCCGCGGCCGCAGATC-3',  
387 reverse 5'-CGAGGTGTAATCTAGAGGATCTTTGTGAAGGAACCTTACTTCTG-3'. The insert  
388 was cloned into the backbone using Infusion HD cloning kit (Takara 638920) to create pTS26,  
389 available at Addgene (plasmid number 175548). This plasmid was injected into 500 *Aedes*  
390 *aegypti* Liverpool embryos by the Insect Transformation Facility (Rockville, MD) using 200  
391 ng/μL plasmid DNA and 200 ng/μL piggyBac transposase mRNA. Ten independent *QUAS-*  
392 *CsChrimson* integration events were isolated under standard mosquito rearing conditions.

### 393 394 **Peripheral sensory appendage microscopy**

395 Mosquitoes 3-4 weeks of age were anesthetized on ice, then maxillary palps and antennae  
396 were removed using sharp forceps and placed in fixative (4% paraformaldehyde, 0.1M  
397 Millonig's Phosphate Buffer pH 7.4, 0.25% Triton X-100) and nutated for 30 minutes at 4°C.  
398 Tissues were washed four times in PBS, then mounted in SlowFade Diamond Antifade  
399 Mountant (ThermoFisher). Images were acquired on an Inverted LSM 780 laser scanning  
400 confocal microscope (Zeiss) using a 25x 0.8 NA multi-immersion objective with oil. Images  
401 were processed using ImageJ.

### 402 403 **Brain Immunostaining**

404 Brain immunostaining was carried out as previously described (Jové et al., 2020). Mosquitoes  
405 1-2 weeks of age were anesthetized on ice, then heads were removed using forceps and  
406 placed into fixative (4% paraformaldehyde, 0.1M Millonig's Phosphate Buffer pH 7.4, 0.25%  
407 Triton X-100) and nutated for 3 hours at 4°C. Heads were washed four times in PBS and kept  
408 on ice during dissections. The brains were dissected using #5 forceps (Dumont) in a droplet of  
409 PBS on a Petri dish coated with SYLGARD silicone elastomer (Dow). Brains were transferred  
410 to a 35 μm mesh cap of a flow cytometry test tube (Fisher 08-771-23) in a 24-well plate

411 containing PBSTx (PBS with 0.25% Triton X-100). Brains were washed four times for 30-60  
412 minutes at room temperature in PBSTx on an orbital shaker before permeabilization and  
413 between each of the following steps. Brains were permeabilized in PBS with 4% Triton X-100  
414 and 2% normal goat serum for 2 days at 4°C on an orbital shaker. We used the mouse anti-  
415 Bruchpilot (brp) monoclonal antibody at a dilution of 1:10,000. The brp antibody was purified by  
416 Frances Weis-Garcia of the Sloan Kettering Institute Antibody & Bioresource from the brp/nc82  
417 hybridoma, developed by Erich Buchner at the Universitätsklinikum Würzburg and obtained  
418 from the Developmental Studies Hybridoma Bank, created by the NICHD of the NIH and  
419 maintained at The University of Iowa, Department of Biology, Iowa City, IA 52242. Rabbit anti-  
420 RFP antibody (Rockland 600-401-379) was used at a dilution of 1:1000 to detect tdTomato  
421 fused to CsChrimson. Brains were incubated in primary antibodies in PBSTx with 2% normal  
422 goat serum for 3 days at 4°C on an orbital shaker. Secondary antibodies were goat anti-mouse  
423 Alexa Fluor 647 (Thermo Fisher A21235) and goat anti-rabbit Alexa Fluor 555 (Thermo Fisher  
424 A32732) both at 1:500 dilution. Brains were incubated in secondary antibodies in PBSTx and  
425 2% normal goat serum for 2 days at 4°C on an orbital shaker. Brains were washed four more  
426 times at room temperature for 30-60 minutes before mounting in SlowFade Diamond Antifade  
427 Mountant (ThermoFisher). Images were acquired on an Inverted LSM 880 Airyscan NLO laser  
428 scanning confocal microscope (Zeiss) using a 25x 0.8 NA multi-immersion objective with oil.  
429 Images were processed using ImageJ.

430

431

### **Rearing mosquitoes for optogenetics**

432 For CsChrimson to respond to red light (625 nm in this paper), it is necessary to supply the all-  
433 trans retinal co-factor. Moreover, it is critical that animals reared for optogenetics be  
434 maintained in the dark to avoid activating CsChrimson inappropriately. Therefore, we  
435 developed a mosquito rearing protocol to deliver all-trans retinal under dark conditions. First,  
436 we carried out experiments to select the best *QUAS-CsChrimson* transgenic insertion among  
437 the 10 lines we generated. We wanted lines with strong and selective behavioral induction in  
438 combination with a QF2 driver, but no basal behavioral activity without a QF2 driver. We also  
439 wanted it to be a single insertion at a known position in the genome, that would not obviously  
440 disrupt a known gene. The insertion site of the transgene in each line was mapped to the  
441 genome using TagMapping (**Stern, 2017**). After being fed with all-trans retinal as described  
442 below, all 10 lines were tested for their response to red light with and without being crossed to  
443 a QF2 driver. Based on these initial screens, a single line with the *QUAS-CsChrimson*  
444 transgene inserted in an intron of the gene LOC23687794 on chromosome 2 at base pair  
445 453,953,698 in the L5.0 version of the *Aedes aegypti* genome (**Matthews et al., 2018**) was  
446 selected for use in all subsequent experiments. This *CsChrimson* strain was outcrossed to wild  
447 type mosquitoes for 8 generations before being homozygosed and used for behavior  
448 experiments. For all experiments except those in **Figure 2I,K**, which used wild type mosquitoes  
449 with a green light startle stimulus, animals were subjected to special rearing conditions to  
450 prepare them for optogenetics. Eggs were hatched in 1 L of hatching broth under a 14-hour  
451 450 nm blue light and a 10-hour dark cycle in a light-tight 26°C incubator with 80% humidity.  
452 Blue light was selected for the light phase of the photoperiod to avoid activating CsChrimson.  
453 The next day 2 L of distilled water was added to the pan, and the following day larvae were  
454 thinned to 450 per pan. Larvae were subsequently sorted for fluorescence markers if  
455 necessary, using a dissecting microscope. Larvae were fed daily with 1-3 tablets of Tetramin  
456 fish food (Pet Mountain 16110M) ground into a powder using a mortar and pestle. Pupae were

457 moved to eclose into adults in a 30 cm x 30 cm x 30 cm insect rearing cage (Bugdorm  
458 DP1000) with ad libitum access to 10% sucrose in sugar-feeding glass bottles. Animals were  
459 not sexed at this stage, so cages contained males and females that freely mated. Behavior  
460 experiments were performed 1-4 weeks post-pupation. Three days before the experiment, the  
461 sugar wicks were replaced with water wicks to starve animals for 24 hours. Two days before  
462 the experiment, the water wicks were replaced with wicks soaked in 10% sucrose and 400  $\mu$ M  
463 all-trans retinal (Sigma, R2500-1G). 50 mL of sucrose and all-trans retinal was used per cage.  
464 Animals were allowed to feed for 1-3 days in the dark on this meal. In pilot experiments we  
465 verified that starved females fed on sucrose and all-trans retinal by observing yellow  
466 pigmentation in the abdomen. Feeding in the dark was used to avoid premature neuronal  
467 activation and bleaching of the all-trans retinal in the sugar feeders. This rearing protocol was  
468 used for all experiments in the opto-membrane feeder, opto-thermocycler, and opto-feeder  
469 experiments.

470

### 471 **Opto-membrane feeder assay**

472 The optomembrane feeder assay was constructed using optomechanical components  
473 (Thorlabs MB12, TR12, RA90) and a black 1/4" thick acrylic platform for the canister of  
474 mosquitoes to rest on. A hole in the bottom of the platform allowed a camera (Blackfly U3-  
475 13S2M-CS, FLIR) outfitted with an 800 nm longpass filter (Midwest Optical LP800-34) to  
476 image through the clear canister. Canisters were constructed from a polycarbonate tube of  
477 diameter 4.5" (McMaster-Carr 8585K56) and 5" long. The bottom was made of clear 1/8" thick  
478 acrylic and attached with plastic epoxy (Loctite 1363118). The top was an inset lid made of  
479 black 1/4" and 1/8" inch acrylic and UV-resistant black mesh (McMaster-Carr 87655K13). The  
480 canister was surrounded by a coil of RGB LEDs (Digikey 289-1189-ND) spaced 1.5" from the  
481 exterior of the canister and controlled by an Arduino Uno board (Arduino A000066).  
482 Mosquitoes were illuminated by 850 nm infrared LEDs surrounding the top of the cylinder of  
483 RGB LEDs. The assay was enclosed in a black 1/4" thick acrylic box of dimensions 15" x 15" x  
484 28" to prevent ambient light from entering the assay. The top of the acrylic box had an entry  
485 port of 4" x 2.7" for CO<sub>2</sub> diffused by a Flystuff Flypad (Genesee Scientific, 59-114), and two  
486 doors on the side, one at the level of the cylinder (10" high x 8" wide) and one at the bottom (8"  
487 high x 10" wide) at the level of the camera. The day before the experiment, mosquitoes were  
488 sexed under cold anaesthesia in white light, placed into the cylindrical canisters, and fed water  
489 and 400  $\mu$ M all-trans retinal in the dark until the experiment commenced. Dental wicks were  
490 soaked in approximately 12.5 mL of the water and all-trans retinal, placed on top of the mesh  
491 of the inset lid. Trials were run in an environmental room at 25-28°C and 70-80% humidity. For  
492 each trial, a canister of 20 mosquitoes was placed on the platform and acclimated for 10  
493 minutes prior to the stimulus. Throughout the acclimation period and trial, the canister was  
494 bathed in dim blue 471 nm light from the RGB LEDs. At the start of the trial, a blood meal  
495 consisting of 5 mL of defibrinated sheep blood (Hemostat Laboratories DSB100) with 2 mM  
496 ATP (Sigma A6419-1G) heated to 42°C was placed on top of the canister. Blood meals were  
497 delivered using an acrylic lid consisting of a 1/16" thick clear acrylic ring with a 2" inner  
498 diameter and 2.6" outer diameter attached to a 1/2" thick clear acrylic ring with a 2.3" inner  
499 diameter and 2.6" outer diameter. This lid was covered with Parafilm on the 1/16" thick side to  
500 create a well for the blood when placed Parafilm-down on the inset lid of the cylindrical  
501 canister. At the start of the experiment, the warm blood meal was pipetted onto the Parafilm.  
502 On top of the blood meal was an inverted 4 oz bottle (SKS Bottle & Packaging 0604-07) filled

503 with water heated to 42°C to keep the blood near body temperature for the duration of the 15  
504 minutes trial. Mosquitoes were given CO<sub>2</sub>, red light (624 nm, 3.5-6 μW/mm<sup>2</sup>), or neither  
505 stimulus throughout the 15-minute trial. 10% CO<sub>2</sub> was mixed with filtered room air using flow  
506 controllers (Aalborg P26A1-BA2) to deliver a 2.7% CO<sub>2</sub> stimulus through the top of the  
507 container. Air flow delivery is described in detail in (Basrur et al., 2020). Between trials, the  
508 lower door was opened for 5 minutes with the air flow on to flush residual CO<sub>2</sub> from the assay.  
509 On a given day of experiments, each of 3 genotypes (*Gr3*, *CsChrimson*, and *Gr3 >*  
510 *CsChrimson*) was tested with each of the 3 stimuli (no stimulus, CO<sub>2</sub>, red light), for a total of 9  
511 trials. The order of trials was rotated between days. Genotypes were blinded to the  
512 experimenter. Attraction to the warm blood meal was quantified by manually counting the  
513 number of mosquitoes on the warm blood meal in the video (1 frame/second) every 15  
514 seconds. Engorgement was quantified by visual examination of mosquitoes at 4°C after the  
515 end of the trial. Between days of experiments, the canisters were cleaned by spraying 70%  
516 ethanol with a spray bottle and wiping down with a soft sponge, rinsed with deionized water,  
517 and air dried.

518

### 519 **Opto-thermocycler assay**

520 The opto-thermocycler assay was constructed on top of a PCR thermocycler (Eppendorf  
521 Mastercycler) using optomechanical components (Thorlabs XE25L12, XE25L24, XE25L09,  
522 XE25T4, RA90, TRA6, TR12). This assay was used as the basis for experiments delivering  
523 light only, light along with heat stimuli, and opto-feeder experiments. Light was delivered using  
524 six red light 627nm LEDs (Luxeon Star SP-01-D9) or six green light 530nm LEDs (Luxeon Star  
525 SP-01-G4) controlled with an Arduino Uno board. Light intensity was measured using a  
526 Coherent Wand UV/VIS Power Sensor (1299161). The surface of the PCR block was covered  
527 in black tape to reduce glare (Thorlabs T137-2.0). Temperature was measured using a type T  
528 thermocouple (Harold G. Schaevitz Industries LLC CPTC-120-X-N) connected to the Arduino  
529 board (Arduino A000066) using a thermocouple amplifier (Adafruit MAX31856). The  
530 thermocouple sensor was placed on the surface of the lower right of the PCR block and  
531 secured using black tape (Thorlabs T137-2.0). Temperature reading and light output were  
532 recorded every 100 milliseconds from the Arduino using a custom Processing script. Video  
533 was synchronized with the light and temperature stimuli with an infrared 940 nm LED (Adafruit  
534 387) covered with tape and placed in the field of view of the camera. Mosquitoes were  
535 illuminated with an infrared 850 nm LED strip (Waveform Lighting 7031.85) surrounding the  
536 plate of mosquitoes orthogonal to the view of the camera. Video was recorded using a Blackfly  
537 camera (FLIR BFS-U3-16S2M-CS) outfitted with a 780 nm longpass filter (Vision Light Tech  
538 LP780-25.5) at 30 frames/second using Spinview software. Heat stimuli were programmed  
539 onto the PCR thermocycler to elicit the desired change in temperature from ambient to skin  
540 temperature (25-35°C) as measured by the thermocouple (Figure 2B). Red light stimuli were  
541 627 nm at an intensity of 12 μW/mm<sup>2</sup>, chosen as the minimum intensity that gave close to the  
542 maximum behavioral response. Green light stimuli were 530 nm at an intensity of 22 μW/mm<sup>2</sup>,  
543 chosen because it was the maximum intensity of our setup and to maximize the chance of  
544 observing a persistent response to green light. To synchronize the heat and light stimuli,  
545 experiments started with a brief dip in temperature followed by a 10-minute acclimation period  
546 after which the experiment started. Experiments in Figure 2E-H were conducted with a single  
547 stimulus presented to mosquitoes to determine the duration of response. In all other  
548 experiments, mosquitoes received multiple stimuli over the course of a 3–6-hour experiment.

549 Data from the rare trials where the mosquito died during the experiment were discarded. For  
550 experiments using red light and heat, trials were delivered 20 minutes apart and the order was  
551 pseudorandomized between multiple sweeps of trials and across days. For experiments using  
552 green light and heat (**Figure 2I,K**), the stimuli were pseudorandomized across sweeps only.  
553 Mosquitoes were assayed in a custom acrylic plate with 3 x 5 wells. The sides of the plate  
554 were cut using a laser cutter from 1/8" thick clear acrylic, then assembled using acrylic glue  
555 (WELD-ON, #4SC Plastic Solvent Glue for Acrylic). The top and bottom were cut from 1/16"  
556 acrylic. The top was left removable to load mosquitoes while the bottom was used to sandwich  
557 a piece of black fiberglass window screen (Breakthrough Premium Products IHLRS3684BL)  
558 creating a mesh bottom for each well. The acrylic bottom piece spaced the mesh bottom of the  
559 wells 1.5 mm from the surface of the PCR block. Wells containing the mosquitoes were 18.5  
560 mm long x 17 mm wide x 12 mm high. The well in the lower right was empty to accommodate  
561 the thermocouple. The day before the experiment, mosquitoes were sexed under cold  
562 anesthesia in white light, placed into the custom plate, and fed water and 400  $\mu$ M all-trans  
563 retinal overnight until the experiment. This was delivered in cotton dental wicks each soaked  
564 with 12.5 mL water and all-trans retinal. Three wicks were laid flat beneath each plate so that  
565 mosquitoes in all wells could access the wicks beneath. Experiments were run at ambient  
566 room temperature and humidity, but the PCR block kept the assay chamber at a fixed  
567 temperature. Between trials the surface of the PCR block was cleaned by wiping with a  
568 Kimwipe moistened with 70% ethanol. Between days of experiments, the canisters were  
569 cleaned by spraying 70% ethanol with a spray bottle and wiping down with a gloved finger,  
570 rinsed with deionized water, and air dried.

### 571 572 **Opto-feeder assay**

573 The opto-thermocycler assay captures probing behavior but does not offer a meal for  
574 engorgement. We therefore modified this device to produce the opto-feeder. The most  
575 biologically relevant meal for host-seeking females would be blood, but its opacity makes it  
576 unsuitable for our video tracking. We therefore used adenosine 5'-triphosphate (ATP) in saline  
577 as a an optically clear proxy for blood. This meal has previously been shown to be highly  
578 palatable and triggers mosquito engorgement equivalent to a blood meal (**Galun et al., 1963,**  
579 **Jové et al., 2020**). To modify the opto-thermocycler to accommodate this blood meal  
580 substitute, a thin aluminum plate (McMaster-Carr 6061 Aluminum sheet 0.025") was  
581 sandwiched between laser cut pieces of acrylic creating wells on the side facing the mosquito.  
582 The wells were 18.5 x 17 x 1 mm. The acrylic was bonded to itself using acrylic glue (WELD-  
583 ON, #4SC Plastic Solvent Glue for Acrylic) and to the aluminum plate with epoxy (Loctite  
584 1363118) and UV-curing glue (Bondic SK8024). The plate was prepared for a trial by adding  
585 500  $\mu$ L of the meal (110 mM NaCl, 20 mM NaHCO<sub>3</sub>, and 2 mM ATP) to each well of the plate  
586 in **Figure 4A-C**. In **Figure 4D-F**, the composition of the meal was 110 mM NaCl, 10 mM  
587 NaHCO<sub>3</sub>, and 2 mM ATP. The plate was covered with Parafilm to provide a membrane for the  
588 mosquitoes to pierce before accessing the meal. The plate was placed directly on top of the  
589 PCR bock to allow maximum heat transfer. The thermocouple was placed on the surface of the  
590 Parafilm in the middle of the well in the lower right corner to record the temperature of the  
591 heated meal. Trials were carried out and synchronized in the same way as opto-thermocycler  
592 experiments. All opto-feeder experiments were single trial.

593  
594

## 595 **Machine-learning based behavior classification**

596 Videos were pre-processed using a custom Python script `tracking_optothermo.py` that  
597 converted the file format, split up videos into ~30-minute chunks, selected frames to create a  
598 background image for centroid tracking, and detected frames where the IR synchronization  
599 LED was illuminated. Next, we used Ctrax (**Branson et al., 2009**) for centroid tracking. A  
600 background model was created using the selected frames from the experimental video. Ctrax  
601 background settings were background brightness high threshold 2.55, low threshold 0.25-0.5  
602 adjusted depending on the video. The area with the infrared synchronization LED was  
603 excluded using a region of interest to avoid interference with the tracking. Mosquitoes that  
604 moved very little, such that they were visible in the background image, were corrected for  
605 using the Fix Background Model option. In tracking settings, shapes were filtered using the  
606 following minimum/maximum: 110/1600 for area, 4/36 for major axis, 4/30 for minor axis,  
607 0.0/0.98 for eccentricity. The rest of the tracking settings were default. We used Ctrax centroid  
608 tracking as input to Animal Part Tracker (APT, <https://github.com/kristinbranson/APT>  
609 downloaded on July 9, 2020) for tracking points on the mosquito body. For opto-thermocycler  
610 experiments we tracked 9 points: the tip and base of the proboscis, the tip of the abdomen,  
611 and 3 points on each foreleg: where the femur connects to the body, the joint between the  
612 femur and the tibia, and the joint between the tibia and the first tarsomere. Opto-thermocycler  
613 classifiers were trained on 320 frames from two videos for female mosquitoes and 102 frames  
614 from one video for male mosquitoes. We tracked 13 points for opto-feeder experiments, the  
615 same 9 points as for opto-thermocycler experiments plus two points at the point of the  
616 abdomen where it connects to the thorax and two points at the midpoint or thickest part of the  
617 abdomen. The opto-feeder classifier was trained on 215 frames from four videos. All APT  
618 classifiers were trained using the Cascaded Pose Regression tracking algorithm. Janelia  
619 Automatic Animal Behavior Annotator [(JAABA) (**Kabra et al., 2013**), downloaded on July 15  
620 2020] was used for classifying specific behaviors. The classifier for flight (called fly2) was used  
621 for all videos of females and males. It was trained from two videos and used appearance and  
622 locomotion features with radius of 10 frames with no post-processing. The other classifiers  
623 additionally used APT information, a larger radius of frames, and minimum bout sizes for  
624 improved accuracy. Separate classifiers were trained for females and males in the opto-  
625 thermocycler and females in the opto-feeder experiments to maximize classifier accuracy in  
626 the face of differences in visual appearance. Probing classifiers (probe5 for female opto-  
627 thermocycler experiments, probemale for male opto-thermocycler experiments, and probeBB  
628 for females in the opto-feeder experiments) included the pair of points proboscis tip and base  
629 as features, along with APT, motion, and appearance features. The grooming and walking  
630 classifiers (walk3 for female and male opto-thermocycler experiments, groom3 and groommale  
631 for female and male opto-thermocycler experiments, respectively, and walkBB and groomBB  
632 for opto-feeder experiments) were trained using APT, locomotor, and appearance features.  
633 APT classifiers were visually inspected for accuracy. APT and JAABA classifiers were  
634 evaluated by the accuracy of ground truthing on the JAABA classifiers. An initial classifier was  
635 trained, then ground truthing was performed on 50-100 segments of 1 second video segments  
636 that were balanced between segments with and without the behavior. These segments were  
637 examined for mis-classified frames and additional training was performed to improve the  
638 classifier. Thus, the ground truth dataset is more challenging than a random one because it  
639 contains frames that were previously mis-classified and so the real accuracy is higher. Training  
640 continued until true positive and true negative rates of were >90% were obtained with 7 of 9

641 classifiers. Two other classifiers had rates slightly below this. The groomBB was trained to  
642 ~84% true positive and negative rate because certain grooming postures are difficult to  
643 distinguish from probing postures. The probemale classifier was trained to ~87% true positive  
644 and ~91% true negative rate because only part of the male proboscis is distinguishable from  
645 the maxillary palps during probing behavior. Classified behaviors for each mosquito track from  
646 JAABA were assigned to single wells according to x-y location of the track to correct the small  
647 numbers of frames where Ctrax detected two mosquitoes per well (usually due to a leg that  
648 was discontinuous with the rest of the animal) and to connect broken tracks to a single  
649 individual mosquito. The IR LED stimulus in the video was aligned with data about temperature  
650 and light stimuli from the Arduino and assigned to frames in the video. Velocity was calculated  
651 by taking the Ctrax x-y position at 100 ms intervals (3 frames).

652

### 653 **Analysis of behavior**

654 To calculate the half-life of the mosquito behavior response in [Figure 2H-J](#) and [Figure 3C,H](#),  
655 the baseline was calculated as the average probing in 2 minutes prior to stimulus onset. A  
656 sliding window of the amount of probing was calculated in 15 second windows starting at  
657 stimulus onset for every frame. The maximum response was defined as the window with the  
658 greatest probing after stimulus onset and  $t_{1/2}$  was defined as the first window in which the  
659 probing was halfway between the maximum response and the baseline. To calculate the  
660 integration of heat and the second stimuli (fictive CO<sub>2</sub>, fictive sugar, or green light) in [Figure](#)  
661 [2—figure supplement 2](#) and [Figure 2M](#), we calculated the average response to each of the  
662 individual stimuli. We added the two responses to get a predicted additive response. For each  
663 individual mosquito, we divided its response by the predicted additive response and multiplied  
664 by 100%. This gave a percent additivity where 0% was no response and 100% was exactly  
665 additive. For line graphs, the additivity signal was smoothed over 4.5 seconds around each  
666 500-millisecond timepoint.

667

### 668 **tSNE analysis**

669 To infer the state of individual mosquitoes in the opto-feeder experiment, we split each  
670 mosquito track into 30 second intervals at 10 second step size and calculated 38 parameters.  
671 The 30 second time interval was selected as a period of time over which the behaviors  
672 exhibited were relevant to interpreting the internal state of the mosquito. The time interval was  
673 varied from 10 to 60 seconds to assure that the results were not sensitive to this parameter  
674 choice ([Figure 4—figure supplement 2](#)). The parameters included the proportion of the time  
675 window that mosquitoes exhibited each behavior and no behavior. Mosquitoes can probe and  
676 walk at the same time so the proportion of time probing and walking, probing not walking, and  
677 walking not probing were included. The number of bouts of each behavior was included.  
678 Velocity parameters included average velocity over the window and average velocity during  
679 each behavior. Transitions between behaviors were included as outgoing rate per second of  
680 transition to all other behaviors or no behavior. For the purposes of transitions and ethograms,  
681 probing and walking were treated as mutually exclusive with probing taking higher precedence  
682 over walking. For all behaviors to avoid rare frames where multiple behaviors were classified  
683 for a single frame the precedence of behaviors were flying > probing > walking > grooming >  
684 no behavior. Based on the total amount of time animals spent performing each behavior,  
685 cutoffs were determined to specify a minimum amount of behavior exhibited. Cutoffs were 0.04  
686 for flight, 0.2 for walking or probing, and 0.3 for grooming. Behavior below these cutoffs was

687 excluded from further analysis. The Python package scikit-learn (<https://scikit-learn.org/>  
688 version 0.24.1) was used for tSNE embedding with parameters n/100 perplexity (1061), and  
689 other default parameters (200 learning rate, 1000 iterations). Multiple perplexities were  
690 compared to assure that results were not sensitive to this parameter choice. tSNE plots were  
691 examined and clusters were segmented manually by grouping densely clustered points. These  
692 clusters were used to annotate videos for visual inspection of what mosquito behaviors they  
693 corresponded to. Names for clusters were chosen based on the characteristics of the clusters  
694 shown in [Figure 4K](#), [Figure 4—figure supplement 1B](#), [Figure 4—figure supplement 2](#), and  
695 video observation. Clusters that included mosquitoes that moved around were named Global  
696 or Local search based on the total amount of movement and contrasting amounts of flight and  
697 walk behaviors. The cluster that included mostly grooming was termed Rest. The cluster that  
698 included mosquitoes that were stationary, probing, and with abdomens expanded after feeding  
699 was termed Engorge. The clusters for Rest, Global Search, and Local Search were single  
700 clusters that were clearly differentiated on the tSNE embedding. The Engorge cluster was  
701 composed of two smaller clusters that, when observed on video, both consisted of mosquitoes  
702 engorging and were therefore combined. Points on the end of the Local Search cluster in the  
703 tSNE embedding with high probing were also examined by video and grouping was kept with  
704 the Local Search cluster.

705

### 706 **Statistical analyses**

707 R (<https://www.r-project.org> version 4.0.5) and Python were used for statistical analysis. Data  
708 distributions were visually examined for normality or tested using the Shapiro-Wilk test.  
709 Normally distributed samples were compared by one sample t-test for paired measurements or  
710 ANOVA and Tukey's test for multiple categories. Non-normally distributed samples were  
711 compared using the Friedman test for multiple category repeated measurements, Kruskal-  
712 Wallis test for multiple category single measurements, or the sign test for skewed paired  
713 measurements. The Friedman and Kruskal-Wallis test were used with Nemenyi post-hoc tests  
714 to determine pairwise differences between categories. T-tests and sign tests were adjusted  
715 using Holm's method for correcting for multiple comparisons. For statistical analyses involving  
716 comparisons of the behavior of males and females, we repeated the tests after accounting for  
717 differences in classifier accuracy by changing the proportion of behavior by this difference (i.e.  
718 4.93% for probing and 3.25% for walking) and confirming that the results were the same.  
719 Sample sizes followed conventions in the field. For experiments with multiple stimuli presented  
720 to each animal, 4-6 days of data were collected. For endpoint and single stimulus experiments,  
721 7-11 days of data were collected.

722

### 723 **Logistic Regression**

724 Logistic regression models for the opto-feeder experiment were trained using the Python  
725 sklearn package with the proportion of time mosquitoes spent in each of the four behaviors  
726 (groom, walk, probe, and fly) for two minutes after the light stimulus as predictors. These  
727 periods of time were -2 to 0 minutes, -8 to -6 minutes, and -14 to -12 minutes relative to the  
728 heat stimulus for the 2-minute, 8-minute, and 14-minute inter stimulus interval experiments.  
729 The dependent variable was whether the mosquito engorged by the end of the experiment.  
730 Models used the liblinear solver, random\_state of 0, and balanced weight\_class. Bootstrapping  
731 was performed using 10,000 resamples with replacement of the engorgement dataset to  
732 determine the distribution of predictive models. 10,000 shuffles of the engorgement data were



733 used to determine whether the predictive model performed above chance. Leave-one-out  
734 cross-validation was used to determine whether the model was overfitted.

735

### 736 **Data availability**

737 Data presented in main and supplementary figures is available in [Supplementary File 1](#). Large  
738 datasets are available at <https://github.com/trevorsorrells/Optothermocycler>.

739

### 740 **Code availability**

741 Analysis code used in this publication is available at  
742 <https://github.com/trevorsorrells/Optothermocycler>.

743

## 744 **References**

- 745 Álvarez-Salvado E, Licata AM, Connor EG, McHugh MK, King BM, Stavropoulos N, Victor JD,  
746 Crimaldi JP, Nagel KI. 2018. Elementary sensory-motor transformations underlying olfactory  
747 navigation in walking fruit-flies. *Elife* **7**: e37815.
- 748 Anholt BR, Ludwig D, Rasmussen JB. 1987. Optimal pursuit times: How long should predators  
749 pursue their prey? *Theor Popul Biol* **31**: 453-464
- 750 Araripe LO, Bezerra JRA, Rivas G, Bruno RV. 2018. Locomotor activity in males of *Aedes*  
751 *aegypti* can shift in response to females' presence. *Parasit Vectors* **11**: 254
- 752 Asahina K, Watanabe K, Duistermars BJ, Hoopfer E, Gonzalez CR, Eyjolfsdottir EA, Perona P,  
753 Anderson DJ. 2014. Tachykinin-expressing neurons control male-specific aggressive arousal  
754 in *Drosophila*. *Cell* **156**: 221-235
- 755 Basrur NS, De Obaldia ME, Morita T, Herre M, von Heynitz RK, Tsitohay YN, Vosshall LB.  
756 2020. *Fruitless* mutant male mosquitoes gain attraction to human odor. *Elife* **9**: e63982
- 757 Bertossa RC, van de Zande L, Beukeboom LW. 2009. The *fruitless* gene in *Nasonia* displays  
758 complex sex-specific splicing and contains new zinc finger domains. *Mol Biol Evol* **26**: 1557-  
759 1569
- 760 Branson K, Robie AA, Bender J, Perona P, Dickinson MH. 2009. High-throughput ethomics in  
761 large groups of *Drosophila*. *Nat Methods* **6**: 451-457
- 762 Chari T, Banerjee J, Pachter L. 2021. The specious art of single-cell genomics. *bioRxiv*: DOI  
763 10.1101/2021.1108.1125.457696
- 764 Clowney EJ, Iguchi S, Bussell JJ, Scheer E, Ruta V. 2015. Multimodal chemosensory circuits  
765 controlling male courtship in *Drosophila*. *Neuron* **87**: 1036-1049
- 766 Corfas RA, Vosshall LB. 2015. The cation channel TRPA1 tunes mosquito thermotaxis to host  
767 temperatures. *Elife* **4**: e11750

- 768 DeGennaro M, McBride CS, Seeholzer L, Nakagawa T, Dennis EJ, Goldman C, Jasinskiene  
769 N, James AA, Vosshall LB. 2013. *orco* mutant mosquitoes lose strong preference for humans  
770 and are not repelled by volatile DEET. *Nature* **498**: 487-491
- 771 Dekker T, Carde RT. 2011. Moment-to-moment flight manoeuvres of the female yellow fever  
772 mosquito (*Aedes aegypti* L.) in response to plumes of carbon dioxide and human skin odour. *J*  
773 *Exp Biol* **214**: 3480-3494
- 774 Dekker T, Geier M, Carde RT. 2005. Carbon dioxide instantly sensitizes female yellow fever  
775 mosquitoes to human skin odours. *J Exp Biol* **208**: 2963-2972
- 776 Demir E, Dickson BJ. 2005. *fruitless* splicing specifies male courtship behavior in *Drosophila*.  
777 *Cell* **121**: 785-794
- 778 Demir M, Kadakia N, Anderson HD, Clark DA, Emonet T. 2020. Walking *Drosophila* navigate  
779 complex plumes using stochastic decisions biased by the timing of odor encounters. *Elife* **9**:  
780 e57524
- 781 Duvall LB, Basrur NS, Molina H, McMeniman CJ, Vosshall LB. 2017. A peptide signaling  
782 system that rapidly enforces paternity in the *Aedes aegypti* mosquito. *Curr Biol* **27**: 3734-3742
- 783 Eiras AE, Jepson PC. 1991. Host location by *Aedes aegypti* (Diptera: Culicidae): a wind tunnel  
784 study of chemical cues. *B Entomol Res* **81**: 151-160
- 785 Endler JA. 1991. Interactions between predators and prey. In *Behavioral Ecology*, Krebs JR,  
786 Davies NB (eds) pp 169-196. Oxford, UK: Blackwell
- 787 Flavell SW, Pokala N, Macosko EZ, Albrecht DR, Larsch J, Bargmann CI. 2013. Serotonin and  
788 the neuropeptide PDF initiate and extend opposing behavioral states in *C. elegans*. *Cell* **154**:  
789 1023-1035
- 790 Galun R, Avi-Dor Y, Bar-Zeev M. 1963. Feeding response in *Aedes aegypti*: Stimulation by  
791 adenosine triphosphate. *Science* **142**: 1674-1675
- 792 Geier M, Bosch OJ, Boeckh J. 1999. Influence of odour plume structure on upwind flight of  
793 mosquitoes towards hosts. *J Exp Biol* **202**: 1639-1648
- 794 Grant AJ, O'Connell RJ. 2007. Age-related changes in female mosquito carbon dioxide  
795 detection. *J Med Entomol* **44**: 617-623
- 796 Grant AJ, Wigton BE, Aghajanian JG, O'Connell RJ. 1995. Electrophysiological responses of  
797 receptor neurons in mosquito maxillary palp sensilla to carbon dioxide. *J Comp Physiol [A]*  
798 **177**: 389-396
- 799 Han W, Tellez LA, Rangel MJ, Jr., Motta SC, Zhang X, Perez IO, Canteras NS, Shammah-  
800 Lagnado SJ, van den Pol AN, de Araujo IE. 2017. Integrated control of predatory hunting by  
801 the central nucleus of the amygdala. *Cell* **168**: 311-324

- 802 Hartberg WK. 1971. Observations on the mating behaviour of *Aedes aegypti* in nature. *Bull*  
803 *World Health Organ* **45**: 847–850
- 804 Hindmarsh Sten T, Li R, Otopalik A, Ruta V. 2021. Sexual arousal gates visual processing  
805 during *Drosophila* courtship. *Nature* **595**: 549-553
- 806 Inagaki HK, Jung Y, Hoopfer ED, Wong AM, Mishra N, Lin JY, Tsien RY, Anderson DJ. 2014.  
807 Optogenetic control of *Drosophila* using a red-shifted channelrhodopsin reveals experience-  
808 dependent influences on courtship. *Nat Methods* **11**: 325-332
- 809 Jové V, Gong Z, Hol FJH, Zhao Z, Sorrells TR, Carroll TS, Prakash M, McBride CS, Vosshall  
810 LB. 2020. Sensory discrimination of blood and floral nectar by *Aedes aegypti* mosquitoes.  
811 *Neuron* **108**: 1163–1180
- 812 Jung Y, Kennedy A, Chiu H, Mohammad F, Claridge-Chang A, Anderson DJ. 2020. Neurons  
813 that function within an integrator to promote a persistent behavioral state in *Drosophila*. *Neuron*  
814 **105**: 322-333
- 815 Kabra M, Robie AA, Rivera-Alba M, Branson S, Branson K. 2013. JAABA: interactive machine  
816 learning for automatic annotation of animal behavior. *Nat Methods* **10**: 64-67
- 817 Klapoetke NC, Murata Y, Kim SS, Pulver SR, Birdsey-Benson A, Cho YK, Morimoto TK,  
818 Chuong AS, Carpenter EJ, Tian Z, Wang J, Xie Y, Yan Z, Zhang Y, Chow BY, Surek B,  
819 Melkonian M, Jayaraman V, Constantine-Paton M, Wong GK et al. 2014. Independent optical  
820 excitation of distinct neural populations. *Nat Methods* **11**: 338-346
- 821 Klowden M. 1981. Initiation and termination of host-seeking inhibition in *Aedes aegypti* during  
822 oöcyte maturation. *J Insect Physiol* **27**: 799-803
- 823 Koehl MA. 2006. The fluid mechanics of arthropod sniffing in turbulent odor plumes. *Chem*  
824 *Senses* **31**: 93-105
- 825 Körding K. 2007. Decision theory: what "should" the nervous system do? *Science* **318**: 606-  
826 610
- 827 Lafferty KD, Kuris AM. 2002. Trophic strategies, animal diversity and body size. *Trends Ecol*  
828 *Evol* **17**: 507-513
- 829 Lahondere C, Vinauger C, Okubo RP, Wolff GH, Chan JK, Akbari OS, Riffell JA. 2020. The  
830 olfactory basis of orchid pollination by mosquitoes. *Proc Natl Acad Sci U S A* **117**: 708-716
- 831 Manoli DS, Foss M, Villella A, Taylor BJ, Hall JC, Baker BS. 2005. Male-specific *fruitless*  
832 specifies the neural substrates of *Drosophila* courtship behaviour. *Nature* **436**: 395-400
- 833 Marques JC, Li M, Schaak D, Robson DN, Li JM. 2020. Internal state dynamics shape  
834 brainwide activity and foraging behaviour. *Nature* **577**: 239-243

- 835 Matthews BJ, Dudchenko O, Kingan SB, Koren S, Antoshechkin I, Crawford JE, Glassford WJ,  
836 Herre M, Redmond SN, Rose NH, Weedall GD, Wu Y, Batra SS, Brito-Sierra CA, Buckingham  
837 SD, Campbell CL, Chan S, Cox E, Evans BR, Fansiri T et al. 2018. Improved reference  
838 genome of *Aedes aegypti* informs arbovirus vector control. *Nature* **563**: 501-507
- 839 Matthews BJ, McBride CS, DeGennaro M, Despo O, Vosshall LB. 2016. The  
840 neurotranscriptome of the *Aedes aegypti* mosquito. *BMC Genomics* **17**: 32
- 841 McMeniman CJ, Corfas RA, Matthews BJ, Ritchie SA, Vosshall LB. 2014. Multimodal  
842 integration of carbon dioxide and other sensory cues drives mosquito attraction to humans.  
843 *Cell* **156**: 1060-1071
- 844 Pang R, van Breugel F, Dickinson M, Riffell JA, Fairhall A. 2018. History dependence in insect  
845 flight decisions during odor tracking. *PLoS Comput Biol* **14**: e1005969
- 846 Potter CJ, Tasic B, Russler EV, Liang L, Luo L. 2010. The Q system: a repressible binary  
847 system for transgene expression, lineage tracing, and mosaic analysis. *Cell* **141**: 536-548
- 848 Riabinina O, Task D, Marr E, Lin CC, Alford R, O'Brochta DA, Potter CJ. 2016. Organization of  
849 olfactory centres in the malaria mosquito *Anopheles gambiae*. *Nat Commun* **7**: 13010
- 850 Rudolfs W. 1922. Chemotropism of mosquitoes. *New Jers AES Bull* **367**: 5-23
- 851 San Alberto DA, Rusch C, Zhan Y, Straw AD, Montell C, Riffell JA. 2021. The olfactory gating  
852 of visual preferences to human skin and colors in mosquitoes. *bioRxiv*:  
853 10.1101/2021.1107.1126.453916
- 854 Stern DL. 2017. Tagmentation-based mapping (TagMap) of mobile DNA genomic insertion  
855 sites. *bioRxiv*: DOI: 10.1101/037762
- 856 van Breugel F, Riffell J, Fairhall A, Dickinson MH. 2015. Mosquitoes use vision to associate  
857 odor plumes with thermal targets. *Curr Biol* **25**: 2123-2139
- 858 Vergassola M, Villermaux E, Shraiman BI. 2007. 'Infotaxis' as a strategy for searching without  
859 gradients. *Nature* **445**: 406-409
- 860 Williams TM, Wolfe L, Davis T, Kendall T, Richter B, Wang Y, Bryce C, Elkaim GH, Wilmers  
861 CC. 2014. Mammalian energetics. Instantaneous energetics of puma kills reveal advantage of  
862 felid sneak attacks. *Science* **346**: 81-85
- 863 Younger MA, Herre M, Ehrlich AR, Gong ZY, Gilbert ZN, Rahiel S, Matthews BJ, Vosshall LB.  
864 2020. Non-canonical odor coding ensures unbreakable mosquito attraction to humans.  
865 *bioRxiv*: DOI 2020.2011.2007.368720  
866

867 **Acknowledgements**

868 We thank Hessam Akhlaghpour, Josie Clowney, Emily Dennis, Ann Kennedy, Philip Kidd, and  
869 members of the Vosshall lab for comments on the manuscript. We thank Allen Lee, Alice  
870 Robie, and Kristin Branson for sharing their unpublished Animal Part Tracker and providing  
871 technical help with running it. We thank Jason Banfelder and Rebecca Bennett with software  
872 setup on the Rockefeller High Performance Computing Cluster; Jim Petrillo, Dan Gross, and  
873 Peer Strogies at the Rockefeller Precision Instrumentation Technologies facility for assistance  
874 with design and fabrication of behavior assays; Gloria Gordon and Libby Mejia for expert  
875 mosquito rearing; Tom Hindmarsh Sten, Veronica Jové, Gaby Maimon, Ben Matthews Chris  
876 Potter, Vanessa Ruta, and Nilay Yapici for discussions; Annie Handler, Jazz Weisman, and Ari  
877 Zolin for technical advice with optogenetics experiments; Ben Matthews, Meg Younger, and  
878 the Aedes Toolkit Group for access to unpublished strains; Cong Li for assisting with an early  
879 version of the individual state analysis; and Rob Harrell at the Insect Transformation Facility for  
880 embryo injections. Pilot experiments for this study used an optogenetic setup in the lab of  
881 Vanessa Ruta. This work was funded by a Jane Coffin Childs postdoctoral Fellowship (T.R.S.),  
882 and a Kavli Neural Systems Institute Pilot Grant and Postdoctoral Fellowship (T.R.S.). L.B.V. is  
883 an investigator of the Howard Hughes Medical Institute.

884  
885 **Author contributions**

886 T.R.S. performed all experiments and analyses in the paper with the exception of **Figure 4I**,  
887 which was performed by A.R.-V. The optogenetic mosquito lines were created and tested by  
888 T.R.S, and A.P., who also developed the rearing and experimental protocol. T.R.S and L.B.V.  
889 conceived the study, created the figures, and wrote the manuscript with input from all authors.

890  
891 **Competing interests**

892 The authors declare no competing interests.

893  
894 **Materials & Correspondence**

895 Correspondence and materials requests should be addressed to Trevor Sorrells and Leslie  
896 Vosshall.

897  
898 **Supplementary figures and tables**

899 **Figure 2—figure supplements 1 and 2**, **Figure 4—figure supplements 1 and 2**, and  
900 **Supplementary Video 1** accompany the paper.

901  
902 **Supplementary information**

903 **Supplementary File 1** includes information on the accuracy of the behavioral classifier and all  
904 raw data and statistical analysis in the paper, including sample sizes, exact p-values, and tests  
905 performed.

906  
907

# Figure 1

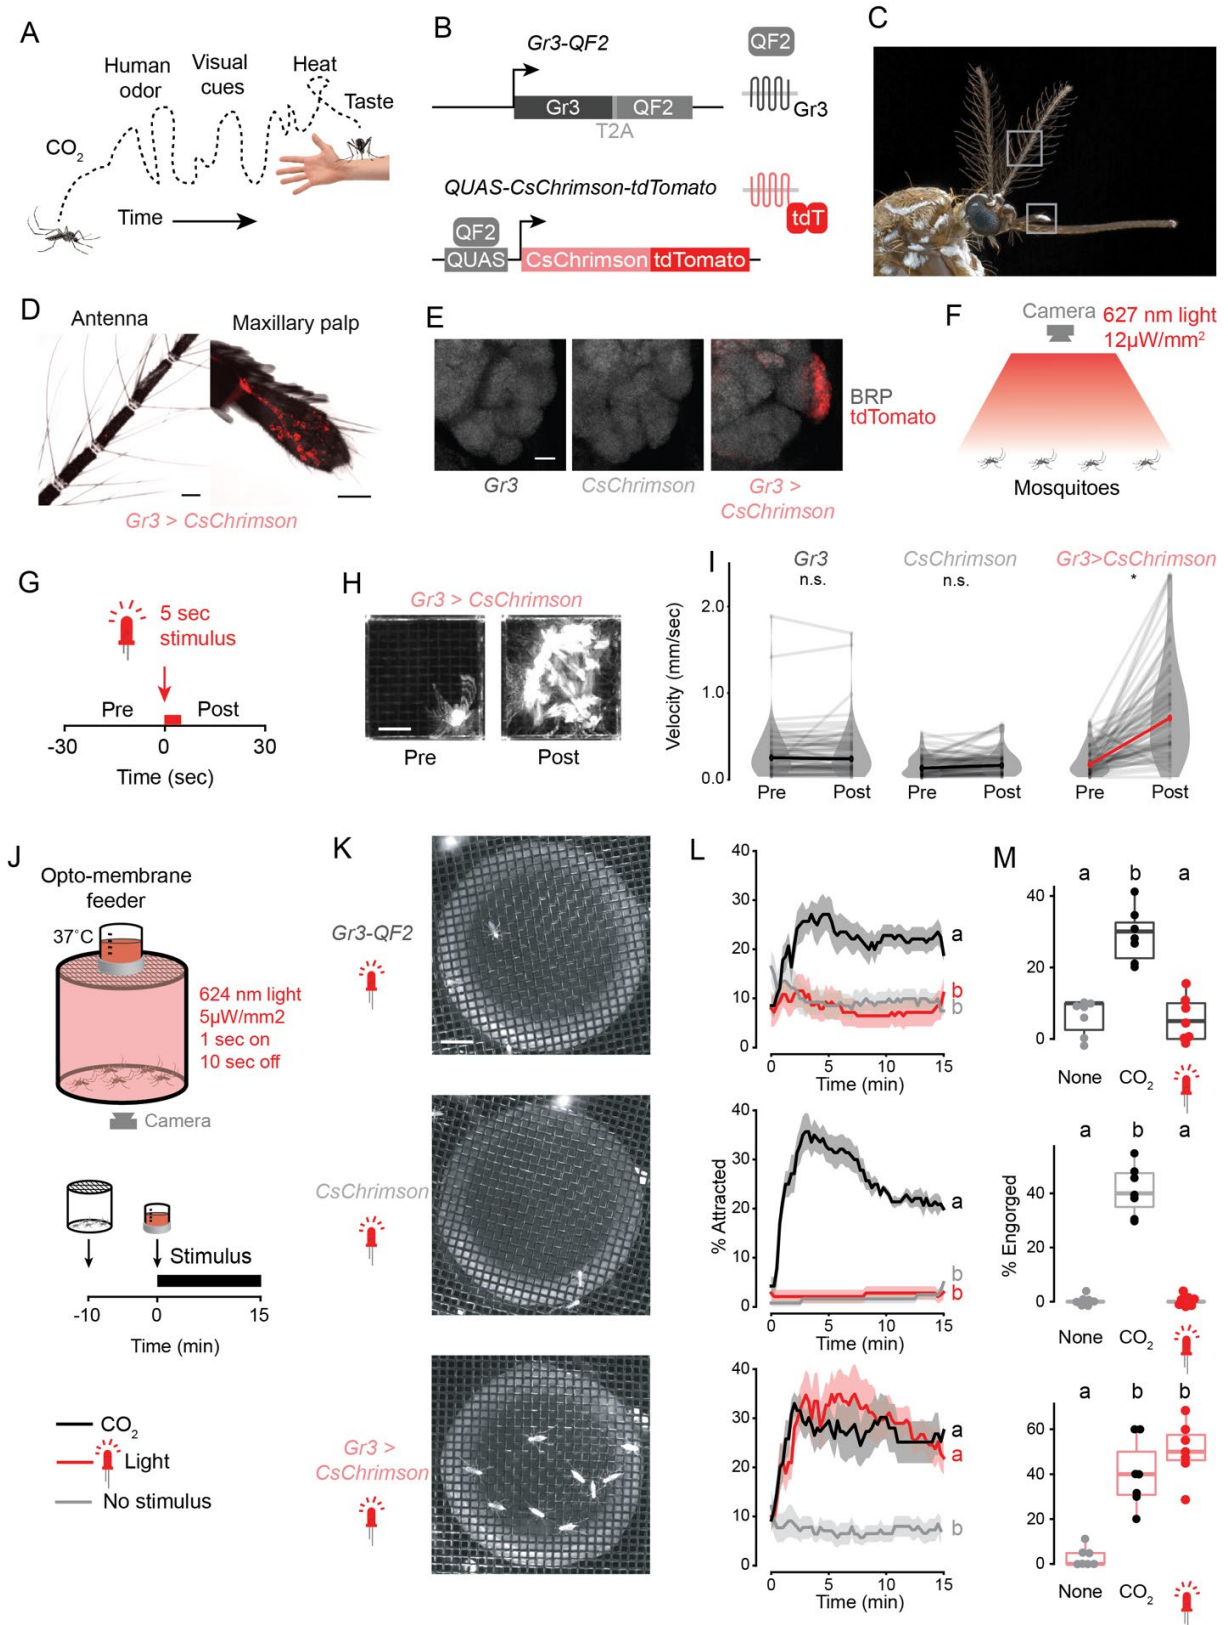

909 **Figure 1.** Optogenetic control of mosquito host seeking and blood feeding. **(A)** Schematic of  
910 human host cues experienced by a host-seeking mosquito over time. **(B)** Schematic of genetic  
911 reagents used for optogenetic activation of CO<sub>2</sub>-sensitive *Gr3* sensory neurons. **(C)** Female  
912 *Aedes aegypti*, grey boxes indicating antenna (top) and maxillary palp (bottom). Photo: Alex  
913 Wild. **(D)** Intrinsic tdTomato fluorescence of whole mounted *Gr3 > CsChrimson* female  
914 mosquito antenna and maxillary palp. Scale bar: 50 μm. **(E)** Maximum-intensity projections of  
915 confocal Z-stacks of antennal lobes in the right-brain hemisphere of the indicated genotype  
916 with immunofluorescent labelling of tdTomato (red) and the synaptic marker BRP (grayscale).  
917 Scale bar: 10 μm. **(F,G)** Diagram **F** and stimulus protocol **G** of optogenetic behavior assay for  
918 mosquito movement. **(H)** Time maximum projection of a single mosquito in the assay in **F** for  
919 30 seconds pre- (left) and post- (right) stimulus. Scale bar: 0.5 cm. **(I)** Velocity of individual  
920 mosquitoes of the indicated genotypes 30 seconds pre- and post-stimulus onset. Data are  
921 plotted as mean of individual mosquitoes (thin grey lines) with median across individuals  
922 indicated with thick black or red line (\**P* < 0.0001, Wilcoxon signed rank test with Holm's  
923 correction for multiple comparison, n.s., not significant, n=70 mosquitoes/genotype). **(J)**  
924 Schematic of opto-membrane feeder (top) and stimulus protocol (bottom). **(K)** Still images of  
925 mosquitoes of the indicated genotype underneath the warm blood meal approximately 7  
926 minutes after the start of red-light stimulation. Scale bar: 1 cm. **(L)** Occupancy of mosquitoes  
927 on warm blood meal in the opto-membrane feeder. Data are plotted as mean (line) ± S.E.M.  
928 (shading). Data labelled with different letters are significantly different at the 5 minute timepoint  
929 (*P* < 0.05, Kruskal-Wallis test followed by Nemenyi post-hoc tests; n=6-7 trials per  
930 genotype/stimulus combination, 18-21 mosquitoes/trial). **(M)** Percent of mosquitoes visually  
931 scored as engorged at the conclusion of the experiment in **L**. Data are plotted as dot-box plots  
932 (median: horizontal line, interquartile range: box, 1.5 times interquartile range: whiskers. Data  
933 labelled with different letters are significantly different (*P* < 0.05, Kruskal-Wallis test followed by  
934 Nemenyi post-hoc tests; n=7 trials per genotype/stimulus combination and 18-21  
935 mosquitoes/trial).

936  
937

## Figure 2

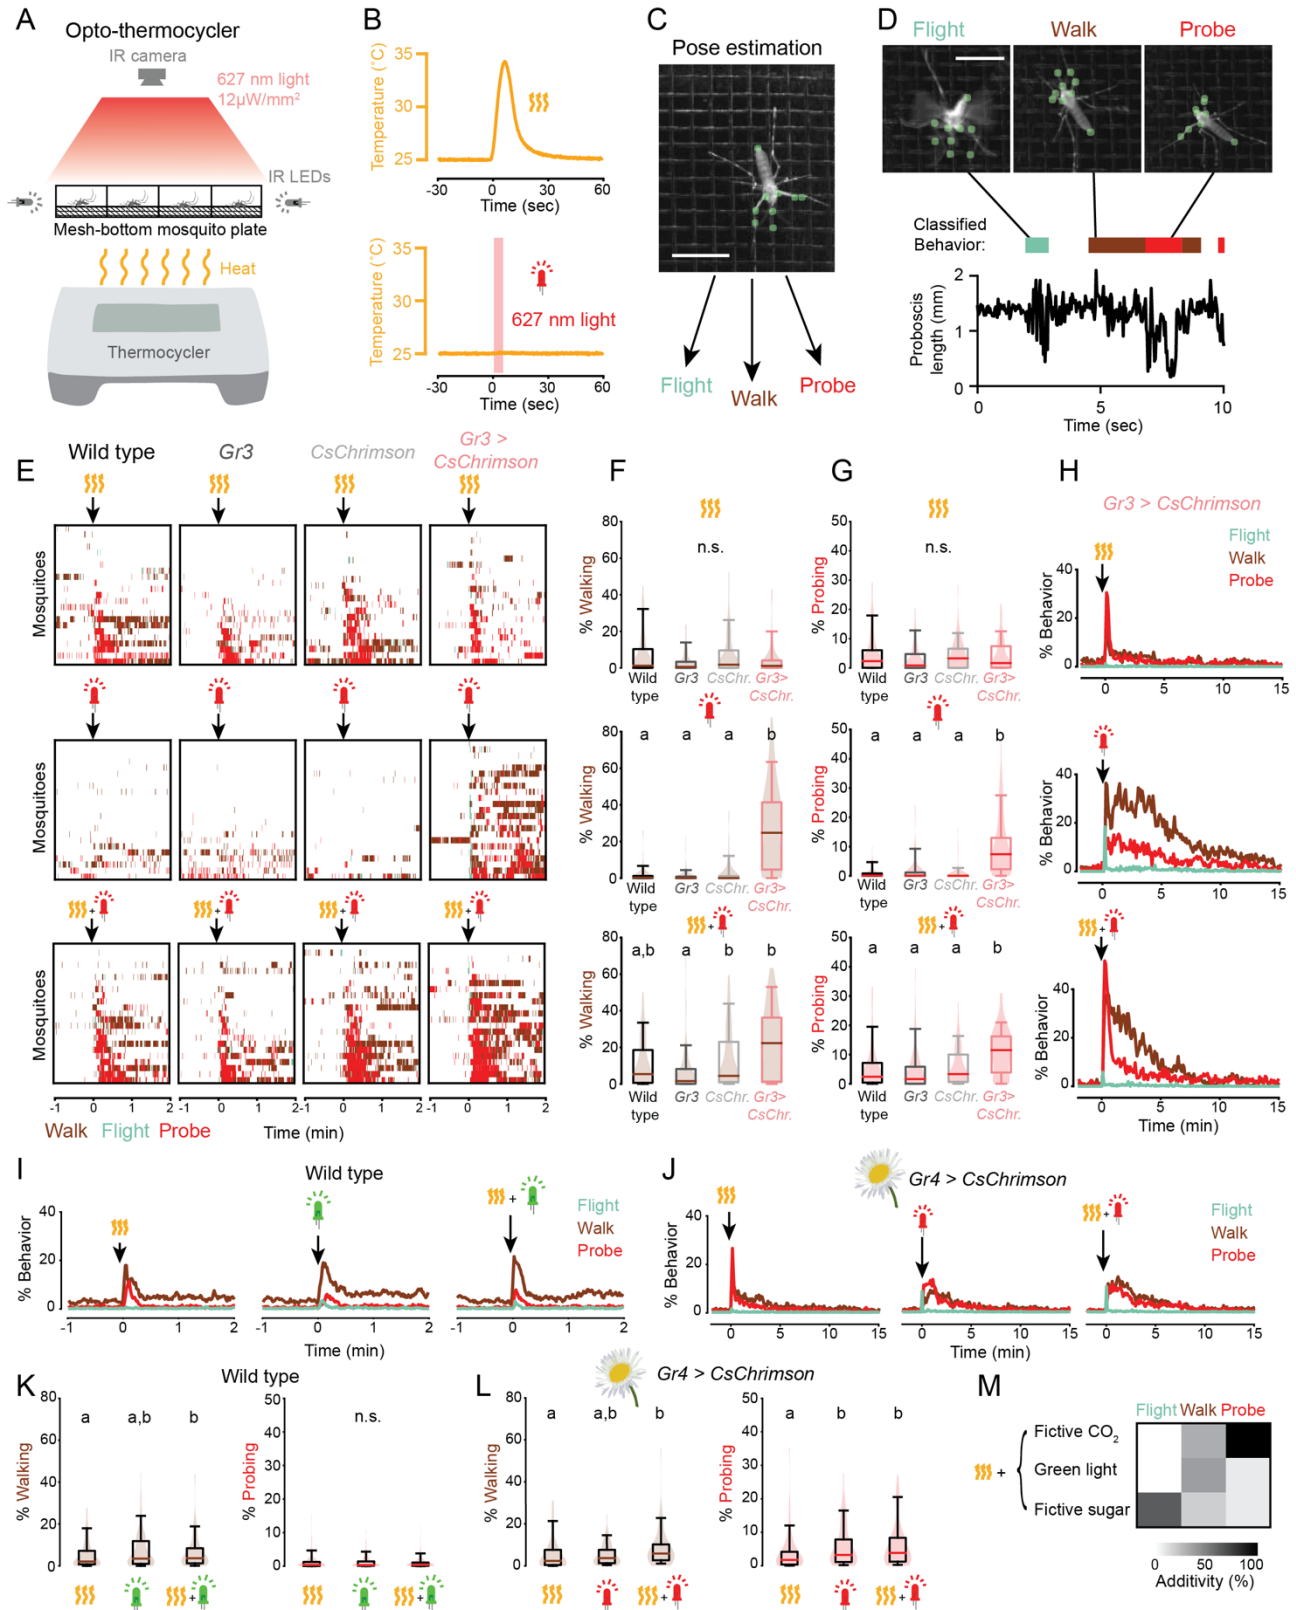



939 **Figure 2.** Fictive CO<sub>2</sub> induces a persistent behavior state. **(A,B)** Schematic of opto-  
940 thermocycler assay **A** and stimuli delivered **B**. **(C)** Still image of a mosquito with pose tracking  
941 of 9 points using Animal Part Tracker. Scale bar: 0.5 cm. **(D)** Still images of a mosquito  
942 exhibiting the indicated classified behaviors (top). Representative plot of proboscis length with  
943 classified behavior superimposed (bottom). Scale bar: 0.5 cm. **(E)** Ethograms of individual  
944 mosquitoes of the indicated genotypes. Data show 1 minute before and an excerpt of the 2  
945 minute after the indicated stimuli from a 20 minute experiment. Each row represents data from  
946 one mosquito. The experiment comprised a total of n=68-70 mosquitoes/condition. All data  
947 were sorted by probing, and every third mosquito (n=22-23) was selected for display here for  
948 clarity. **(F,G)** Quantification of walking **F** and probing **G** behavior exhibited by individual  
949 mosquitoes from the experiment in **E** during the 5 minute after stimulus onset. Data are plotted  
950 as violin-box plots (median: horizontal line, interquartile range: box, 5<sup>th</sup> and 95<sup>th</sup> percentiles  
951 indicated: whiskers). Data labelled with different letters are significantly different ( $P < 0.05$ ,  
952 Kruskal-Wallis test followed by Nemenyi post-hoc tests, n.s., not significant, n=68-70  
953 mosquitoes/genotype, 1 stimulus per trial). **(H)** Plot of percent individual *Gr3 > CsChrimson*  
954 mosquitoes exhibiting the indicated behavior from 2 minute before to 15 minutes after stimulus  
955 onset. Data from experiment in **E**. **(I,J)** Plot of percent individual wild type **I** and *Gr4 >*  
956 *CsChrimson* **J** mosquitoes exhibiting the indicated behavior from 1 minute before to 2 minutes  
957 after stimulus onset **I** or 2 minutes before to 15 minutes after stimulus onset **J** excerpted from a  
958 20 minute experiment. (**I**: n=140 mosquitoes, average of 2 stimulus presentations/mosquito; **J**:  
959 n=69 mosquitoes, average of 3 stimulus presentations/mosquito). Flower image used for *Gr4 >*  
960 *CsChrimson* indicates that plant nectar is a sugar source. **(K,L)** Quantification of **I** and **J** for 5  
961 minutes after stimulus onset. Data are plotted as violin-box plots (median: horizontal line,  
962 interquartile range: box, 5<sup>th</sup> and 95<sup>th</sup> percentiles: whiskers). Distribution represents individual  
963 mosquitoes, averaged over multiple stimulus presentations. Data labelled with different letters  
964 are significantly different ( $P < 0.05$ , Friedman test followed by Nemenyi post-hoc tests, n.s., not  
965 significant). **(M)** Median additivity of heat and the indicated stimuli presented simultaneously.  
966 Additivity of 100% corresponds to the ) case when combined stimuli equal the sum of  
967 responses to individual stimuli. Data from **E-L**. See also [Figure 2—figure supplement 1](#) and  
968 [Figure 2—figure supplement 2](#).

969  
970

## Figure 3

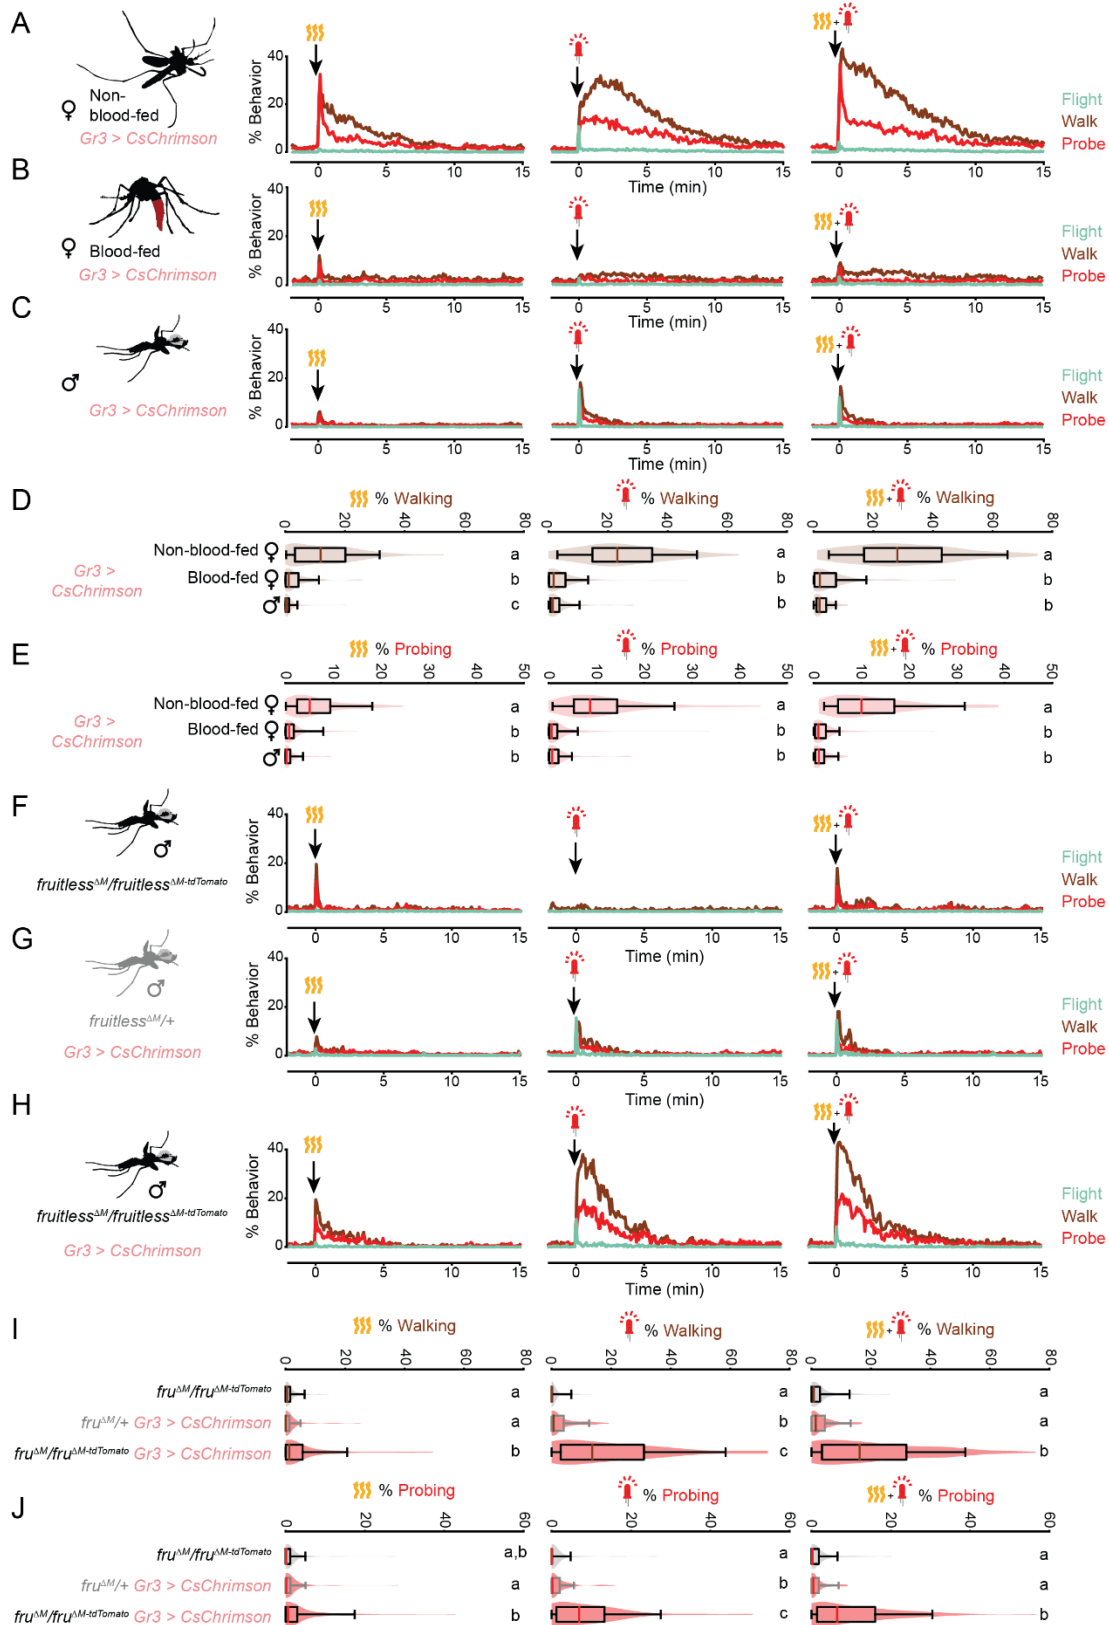

972 **Figure 3.** The persistent state is specific to host seeking. **(A-C)** Response of non-blood-fed  
973 female **A**, blood-fed female **B**, and male **C** *Gr3 > CsChrimson* mosquitoes to the indicated  
974 stimuli, plotting each behavior from 2 minutes before to 15 minutes after stimulus onset  
975 (n=98/group, average of 3 stimulus presentations/mosquito). **(D,E)** Quantification of walking **D**  
976 and probing **E** from data in **A-C** for 5 minutes after stimulus onset. **(F-H)** The behavioral  
977 response of males of the indicated genotype for 15 minutes after the indicated stimuli, plotting  
978 each behavior from 2 minutes before to 15 minutes after stimulus onset (n=97-98/genotype,  
979 average of 3 stimulus presentations/mosquito). **(I,J)** Quantification of walking **I** and probing **J**  
980 from data in **F-H** for 5 minutes after stimulus onset. In **D,E** and **I,J**, data are plotted as violin-  
981 box plots (median: horizontal line, interquartile range: box, 5th and 95th percentiles: whiskers).  
982 The distribution represents individual mosquitoes, averaged over multiple stimulus  
983 presentations. Data labelled with different letters are significantly different ( $P < 0.05$ , Kruskal-  
984 Wallis test followed by Nemenyi post-hoc tests, n.s., not significant).

985  
986

## Figure 4

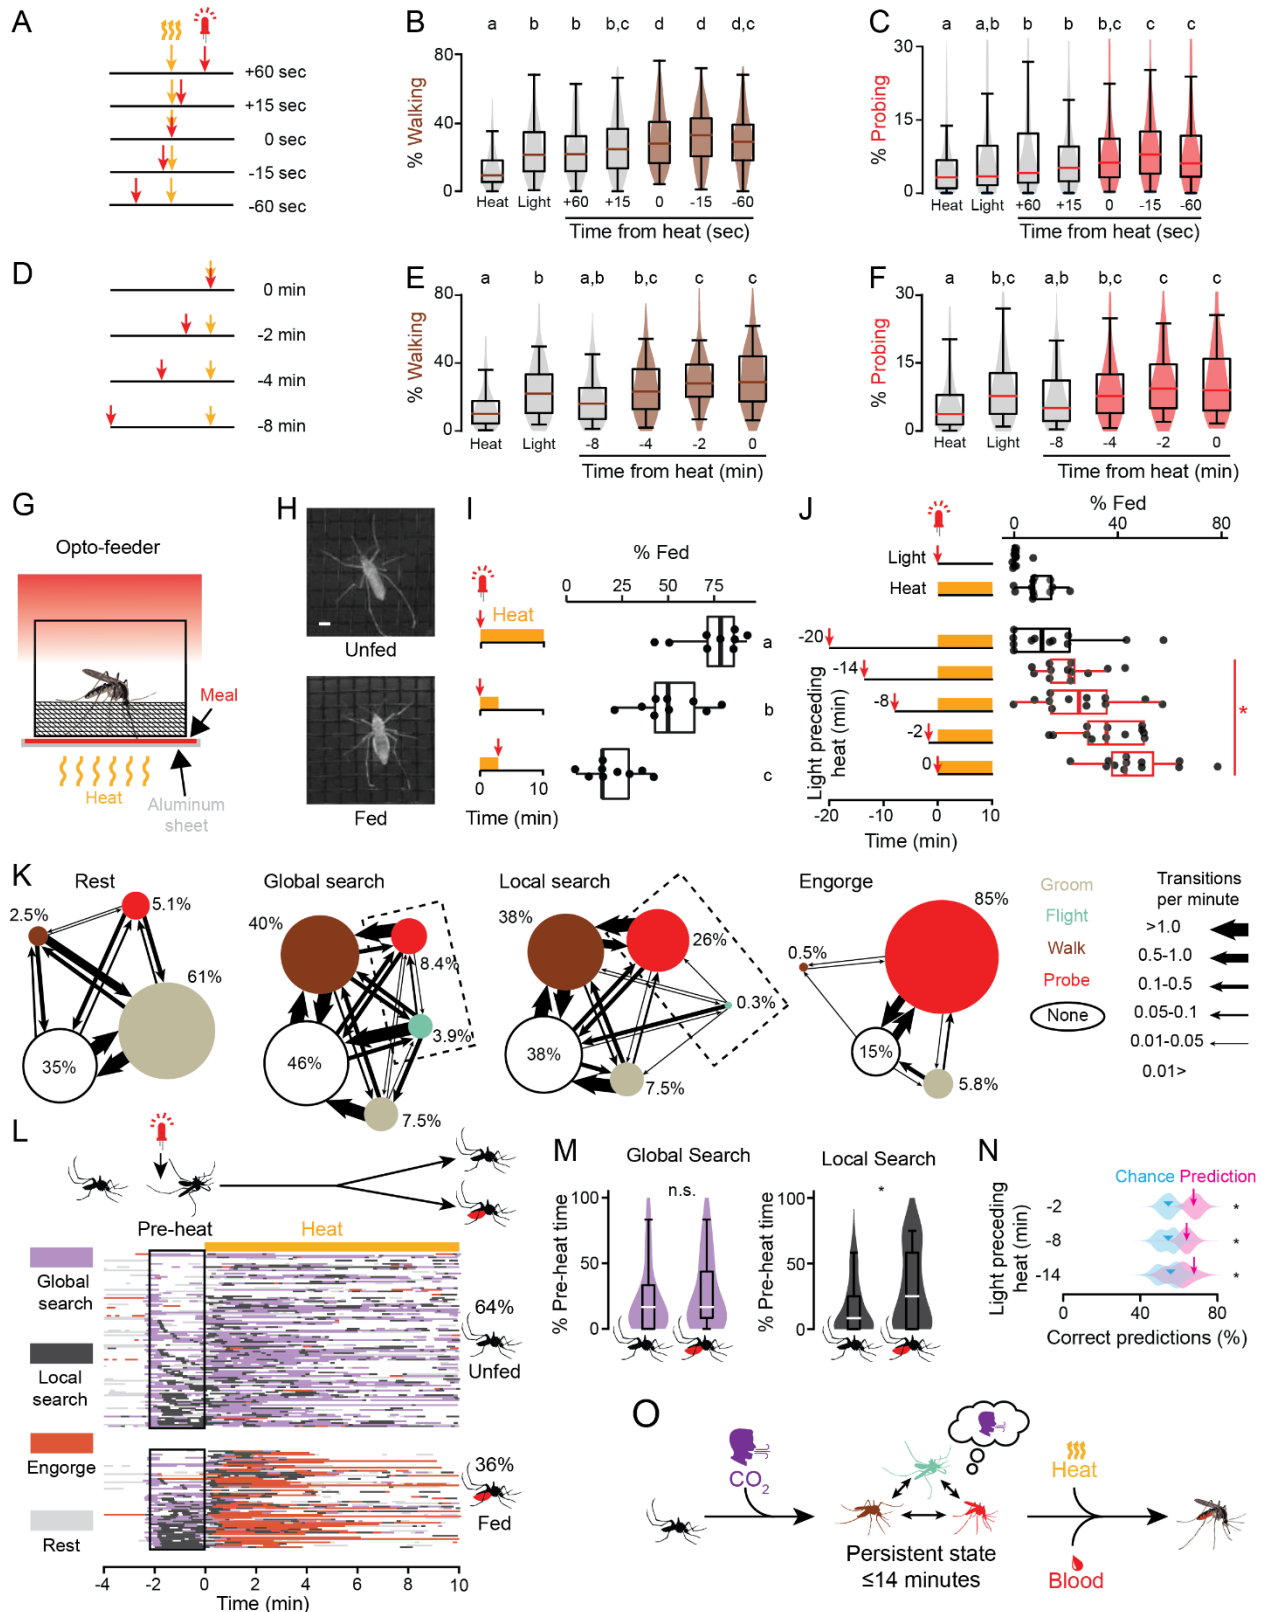

988 **Figure 4.** The persistent state integrates host cues and decision making in time. **(A-F)**  
989 Schematic of stimuli presentation **A,D** and quantification of walking **B,E** and probing **C,E** in the  
990 5 minutes after the first stimulus onset (n=111-112 mosquitoes, 2 stimulus  
991 presentations/mosquito). In **B, C, E,** and **F,** data are displayed as violin-box plots (median:  
992 horizontal line, interquartile range: box, 5th and 95th percentiles: whiskers). Data labelled with  
993 different letters are significantly different ( $P<0.05$ , Friedman test followed by Nemenyi post-hoc  
994 tests). Data that are significantly different from heat or light are shaded in brown **B,E** or red  
995 **C,F.** **(G)** Schematic of opto-feeder assay. **(H)** Still images of unfed (top) and fed (bottom)  
996 mosquitoes. Scale bar: 1 mm. **(I)** Percent mosquitoes engorged in response to the indicated  
997 stimuli in the opto-feeder assay (n=9 trials/stimulus, 14 mosquitoes/trial). Data labelled with  
998 different letters are significantly different ( $P<0.05$ , ANOVA followed by Tukey's post-hoc test).  
999 **(J)** Percent mosquitoes engorged in response to the indicated cues in the opto-feeder assay  
1000 (14 mosquitoes/trial n=11 trials/stimulus). Data in **I,J** are displayed as dot-box plots (median:  
1001 horizontal line, interquartile range: box, 1.5 times interquartile range: whiskers). Dot-box plots  
1002 in **J** with a red border signify data where combined light and heat stimuli are greater than the  
1003 sum of individual stimuli ( $*P<0.05$ , Student's t-test, after adjustment for multiple comparisons  
1004 using Holm's method). **(K)** Transition ethograms for each of the four states indicating the  
1005 proportion of each behavior and the rate of transitions between them, with dashed rectangle  
1006 highlighting difference between global and local search. See also [Figure 4—figure supplement 1](#)  
1007 and [Figure 4—figure supplement 2](#). **(L)** Inferred states of 168 individual mosquitoes from the  
1008 2 minutes pre-heat stimulus from experiment in **J,** separated into those that were visually  
1009 scored as unfed (top, n=108) or fed (bottom, n=60) at the end of the experiment. Each row  
1010 represents data from one mosquito and data are sorted according to the amount of local  
1011 search during the pre-heat period. White indicates none of the four states were inferred (i.e.  
1012 the mosquito was primarily motionless). **(M)** Quantification of the percent of time mosquitoes  
1013 spent in the indicated state during the 2 minutes pre-heat period. Data are plotted as violin-box  
1014 plots (median: horizontal line, interquartile range: box, 5th and 95th percentiles: whiskers ( $*P<$   
1015  $0.01$ , Mann-Whitney U-test, n.s., not significant). **(N)** Performance of a classifier trained on the  
1016 proportion of each behavior in pre-heat period and used to predict feeding (magenta arrow)  
1017 along with 10,000 bootstrapped classifiers (magenta violin plot). Chance value (cyan  
1018 arrowhead) indicates the median performance of model on 10,000 shuffles (cyan violin plot) of  
1019 the feeding data in **J.** (n=166-168 mosquitoes/stimulus,  $P=2e-4$ , 0.0246, 0.0123 for 2, 8, and  
1020 14 minutes pre-heat periods, respectively, bootstrapped z-test). **(O)** Summary of the persistent  
1021 internal state for host-seeking behavior. Color of the mosquito silhouettes indicates the  
1022 behavior depicted using the colors in **K.**

1023  
1024

## Figure 2—figure supplement 1

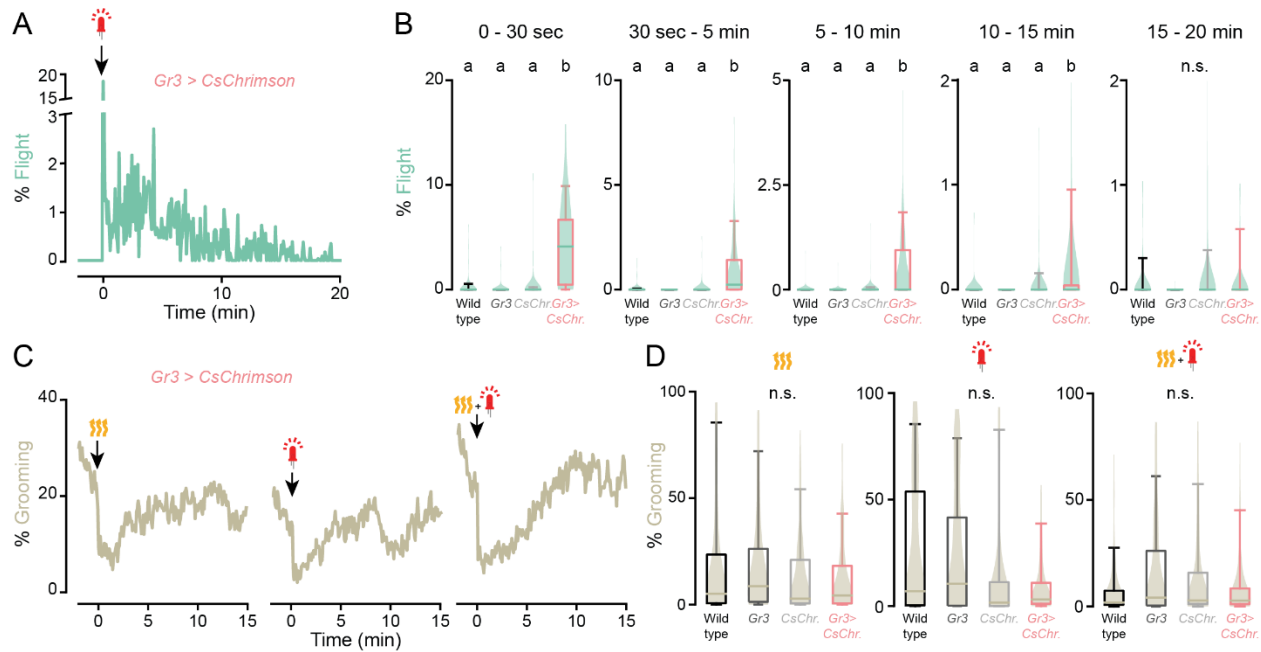

1026

**Figure 2—figure supplement 1.** Fictive CO<sub>2</sub> triggers flight events for 15 minutes. **(A,C)**

Percent indicated behavior of *Gr3 > CsChrimson* females from 2 minutes before to 15 minutes after stimulus onset in response to the indicated stimuli. Data from **Figure 2E-H**. **(B,D)**

Quantification of the behavior in **A**, **C** along with data collected from the additional indicated genotypes. Data from **Figure 2E-H**. Data are plotted as violin-box plots (median: horizontal line, interquartile range: box, 5th and 95th percentiles: whiskers). Data labelled with different letters are significantly different ( $P < 0.05$ , Kruskal-Wallis test followed by Nemenyi post-hoc tests. n.s., not significant,  $n = 68-70$  mosquitoes).

1034

1035  
1036

## Figure 2—figure supplement 2

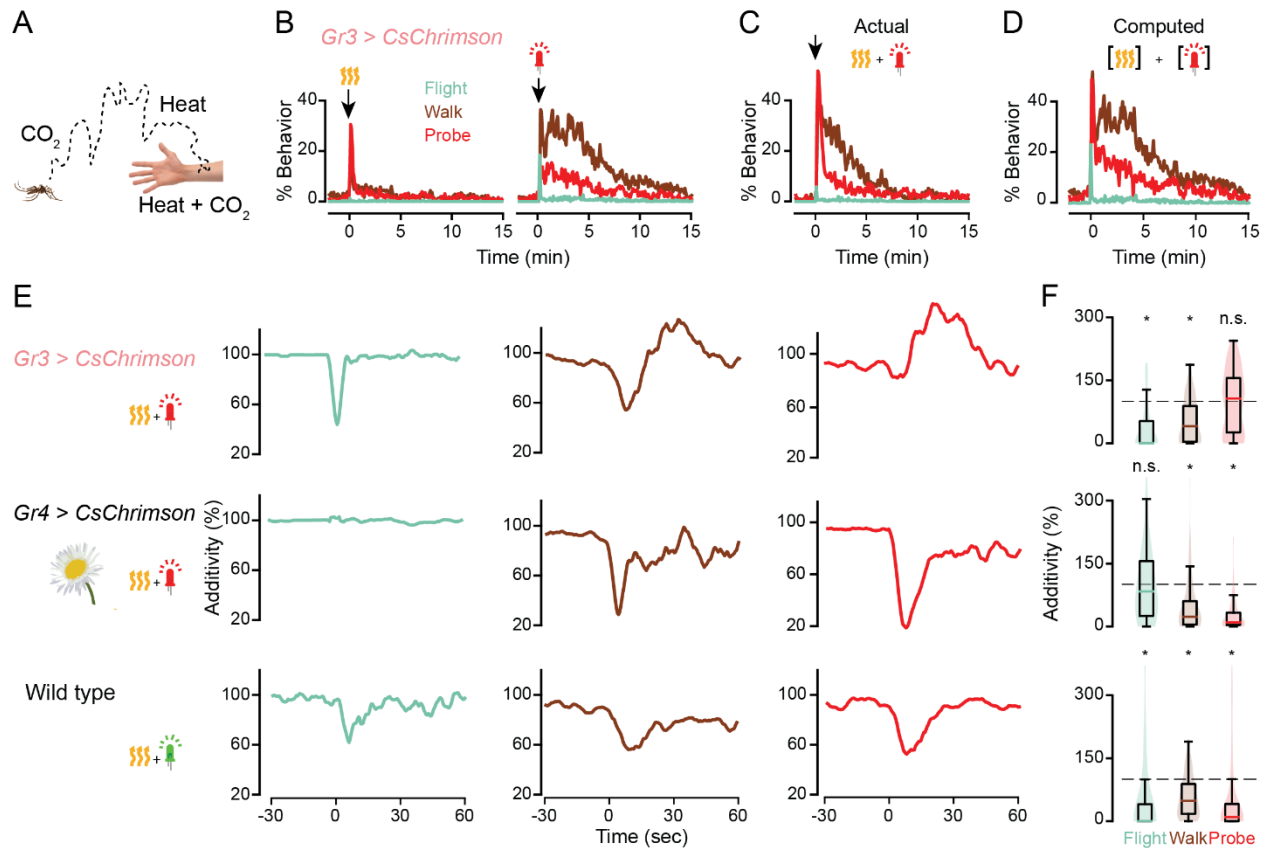

1038

1039

1040

1041

1042

1043

1044

1045

1046

1047

1048

1049

**Figure 2—figure supplement 2.** Host cues are integrated with different computations than non-host cues. **(A)** Mosquitoes sense host cues separately and simultaneously at different distances from the host. **(B-D)** Responses to individual **B** or combined **C** stimuli or a computed sum of individual stimuli **D**. Plots in **B,C** are reprinted from [Figure 2H](#) for comparison with **D**. **(E)** Differences between calculated and actual responses for the indicated genotypes and stimuli from 30 seconds before to 1 minute after stimulus onset, smoothed using a box filter of radius 2.25 seconds.  $n=70$  for *Gr3 > CsChrimson*,  $n=69$  for *Gr4 > CsChrimson*,  $n=140$  for wild type. **(F)** Quantification of E for the first 15 seconds after stimulus onset. Data are plotted as violin-box plots (median: horizontal line, interquartile range: box, 5th and 95th percentiles: whiskers). (\* $P < 0.0001$ , sign test using Holm's correction for multiple comparisons, n.s., not significant).

1050  
1051

## Figure 4—figure supplement 1

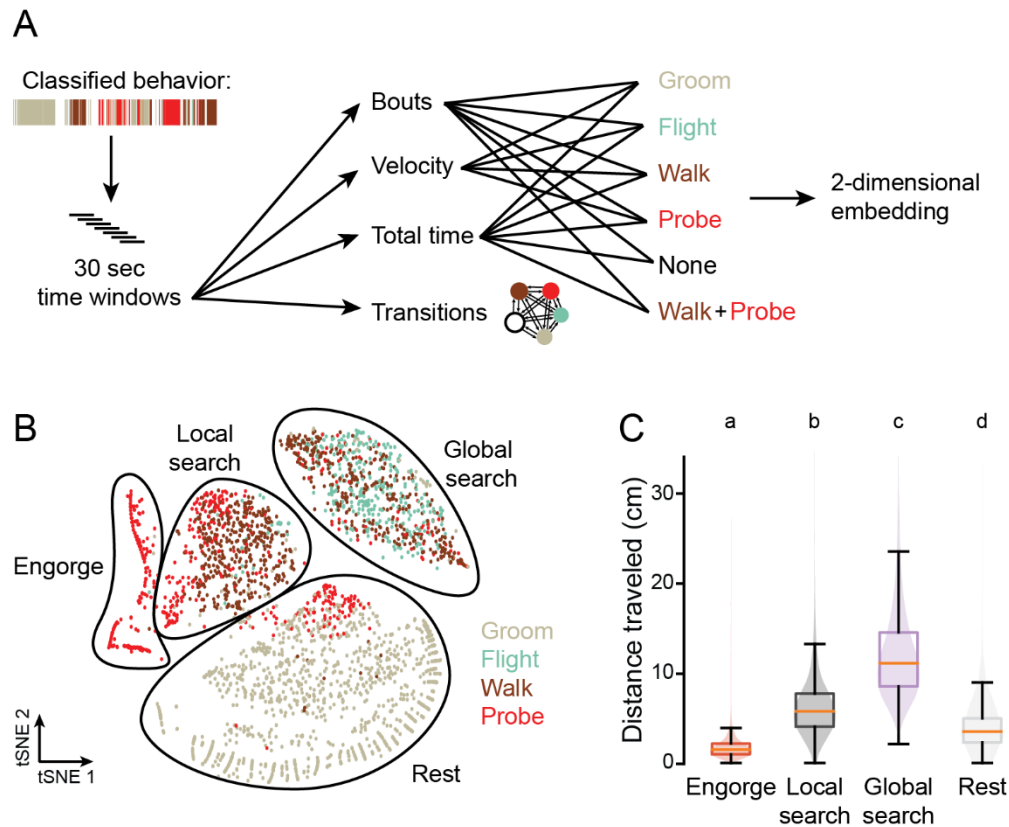

1053  
1054  
1055  
1056  
1057  
1058  
1059  
1060  
1061  
1062  
1063  
1064  
1065  
1066  
1067  
1068  
1069

**Figure 4—figure supplement 1.** Inference of internal state from behavior. **(A)** Schematic of analysis. Classified behavior reflects the output of APT followed by JAABA behavior classifiers. **(B)** t-stochastic neighbor embedding (tSNE) for 30 second time windows spanning 4 minutes prior to the light stimulus to 10 minutes after heat onset for individual mosquitoes from [Figure 4J](#). Points are colored by strong enrichment of the corresponding behavior. State categories were bounded with a black line by visual inspection of the tSNE plot, graphing the behavior characteristics of each cluster, and comparing with video of the mosquitoes in each state. Shown is a random subset of 3,000 time windows from 106,076 total windows from all 7 stimulus types,  $n=1,162$  mosquitoes. **(C)** Total distance travelled over the course of 30 second time windows for each behavior state with the following number windows from each state: engorge,  $n=5,634$ ; local search,  $n=11,124$ ; global search,  $n=15,466$ ; rest,  $n=9,891$ . Time windows were taken from 4 minutes before the light stimulus to 10 minutes after heat onset. Data are plotted as violin-box plots (median: horizontal line, interquartile range: box, 5th and 95th percentiles: whiskers). Data labelled with different letters are significantly different ( $P < 0.0001$ , Kruskal-Wallis test followed by Nemenyi post-hoc tests).



1070  
1071

## Figure 4—figure supplement 2

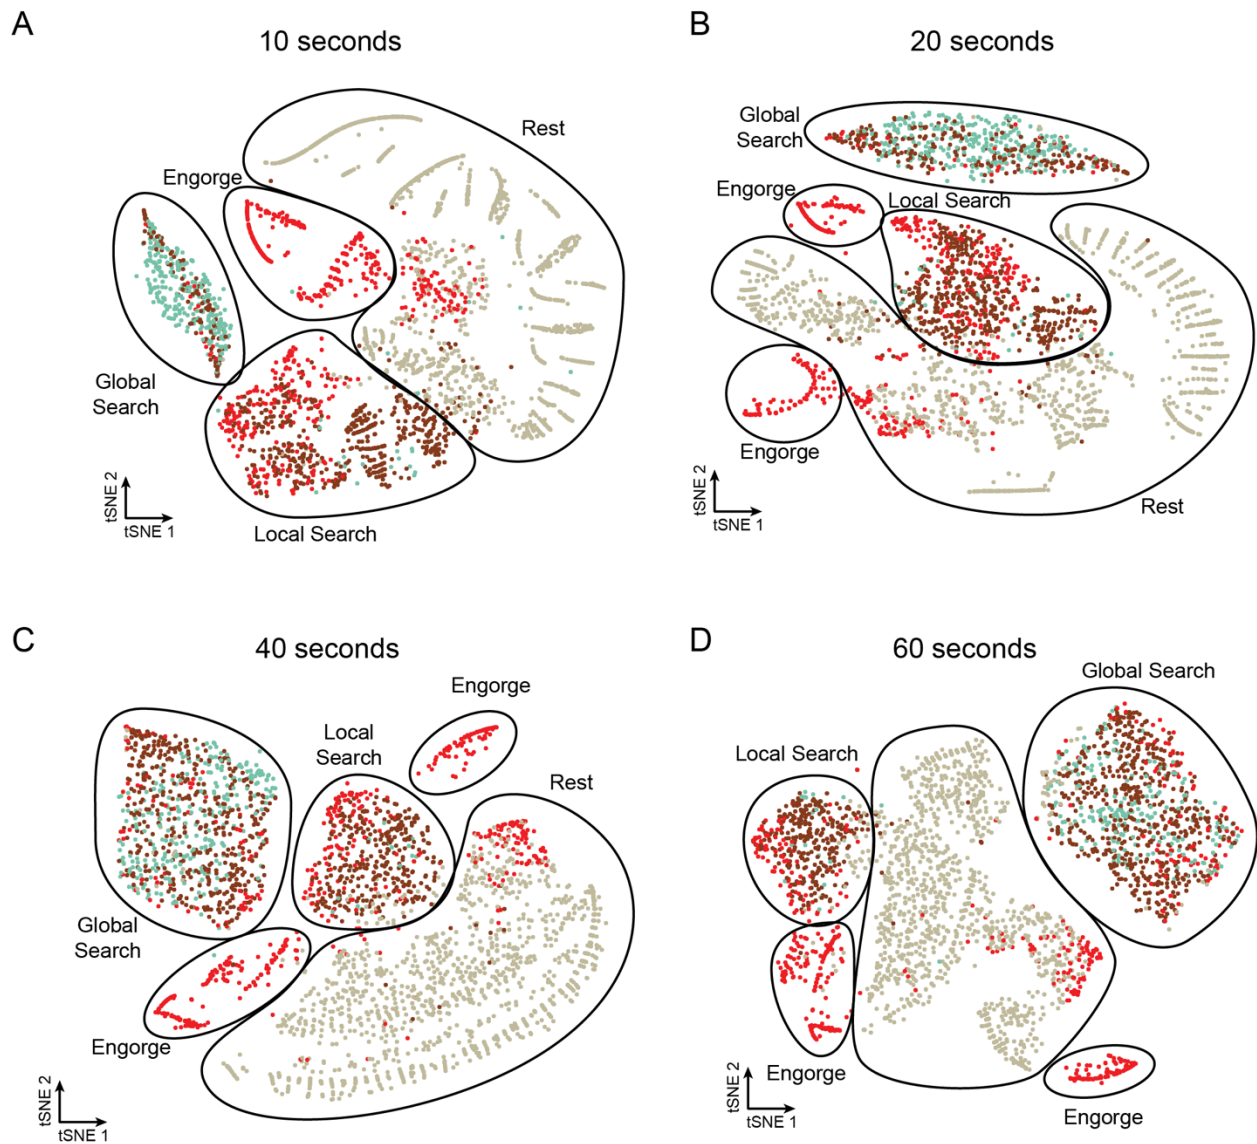

1073  
1074  
1075  
1076  
1077  
1078  
1079

**Figure 4—figure supplement 2.** Mosquito states are consistent across window duration. (A-D) tSNE for time windows of the indicated duration for individual mosquitoes from Figure 4J. Points are colored by strong enrichment of the corresponding behavior. State categories were bounded with a black line by visual inspection of the tSNE plot. Shown is a random subset of 3,000 time windows from 103,658 A, 105,387 B, 106,044 C, and 105,287 D total windows from all 7 stimulus types, n=1,162 mosquitoes.
